# Supplementary material for: Question design in nurse-led and GP-led telephone triage for same-day appointment requests: a comparative investigation
Source: PubMed Central journal article supplement — BMJ Open. 2014 Mar 5;4(3):e004515. doi: 10.1136/bmjopen-2013-004515 (PMC3948453; doi:10.1136/bmjopen-2013-004515), 2014-03-05

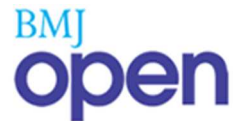

**Question design in Nurse and GP-Led Telephone Triage for  
Same-Day Appointment Requests: A Comparative  
Investigation**

|                                    |                                                                                                                                                                                                                                                                                                                                                                                                                                                                                                                       |
|------------------------------------|-----------------------------------------------------------------------------------------------------------------------------------------------------------------------------------------------------------------------------------------------------------------------------------------------------------------------------------------------------------------------------------------------------------------------------------------------------------------------------------------------------------------------|
| Journal:                           | <i>BMJ Open</i>                                                                                                                                                                                                                                                                                                                                                                                                                                                                                                       |
| Manuscript ID:                     | bmjopen-2013-004515                                                                                                                                                                                                                                                                                                                                                                                                                                                                                                   |
| Article Type:                      | Research                                                                                                                                                                                                                                                                                                                                                                                                                                                                                                              |
| Date Submitted by the Author:      | 20-Nov-2013                                                                                                                                                                                                                                                                                                                                                                                                                                                                                                           |
| Complete List of Authors:          | Murdoch, Jamie; University of East Anglia, School of Nursing Sciences<br>Barnes, Rebecca; Bristol University, Centre for Academic Primary Care,<br>School for Social and Community Medicine<br>Pooler, Jill; University of Exeter Medical School, Primary Care Research<br>Group<br>Lattimer, Valerie; UEA, School of Nursing Sciences<br>Fletcher, Emily; University of Exeter Medical School, Primary Care Research<br>Group<br>Campbell, John; University of Exeter Medical School, Primary Care<br>Research Group |
| <b>Primary Subject<br>Heading</b>: | Qualitative research                                                                                                                                                                                                                                                                                                                                                                                                                                                                                                  |
| Secondary Subject Heading:         | Communication                                                                                                                                                                                                                                                                                                                                                                                                                                                                                                         |
| Keywords:                          | Organisation of health services < HEALTH SERVICES ADMINISTRATION &<br>MANAGEMENT, PRIMARY CARE, QUALITATIVE RESEARCH                                                                                                                                                                                                                                                                                                                                                                                                  |
|                                    |                                                                                                                                                                                                                                                                                                                                                                                                                                                                                                                       |

SCHOLARONE™  
Manuscripts

# Question design in Nurse and GP-Led Telephone Triage for Same-Day Appointment

## Requests: A Comparative Investigation

Jamie Murdoch<sup>1</sup>, Rebecca Barnes<sup>2</sup>, Jillian Pooler<sup>3</sup>, Val Lattimer<sup>1</sup>, Emily Fletcher<sup>3</sup>, John L. Campbell<sup>3</sup>

### Corresponding Author:

Dr Jamie Murdoch

School of Nursing Sciences, Edith Cavell Building, Faculty of Medicine and Health Sciences,

University of East Anglia, Norwich Research Park, Norwich NR4 7TJ

Telephone: 01603-597090

Fax: 01603-597019

Email: [Jamie.murdoch@uea.ac.uk](mailto:Jamie.murdoch@uea.ac.uk)

### Addresses

<sup>1</sup>School of Nursing Sciences, Edith Cavell Building, Faculty of Medicine and Health

Sciences, University of East Anglia, Norwich Research Park, Norwich NR4 7TJ

<sup>2</sup>Centre for Academic Primary Care, School for Social and Community Medicine, Canynge

Hall, 39 Whatley Road, Bristol BS8 2PS

<sup>3</sup>Primary Care Research Group, University of Exeter Medical School, Room 106, Smeall

Building, St Luke's Campus, University of Exeter, Magdalen Road, Exeter EX1 2LU

### Keywords:

Telephone; triage; communication; primary care

**Word Count:** 3849 words

## Abstract

**Objective:** To compare doctors' and nurses' communication with patients in primary care telephone triage consultations.

**Design:** Qualitative comparative study of content and form of questions in 51 telephone triage encounters between practitioners (GPs= 29; nurses=22) and patients requesting a same-day appointment in primary care. Audio-recordings of nurse-led calls were synchronised with video recordings of nurse's use of computer decision support software (CDSS) during triage.

**Setting:** Two GP practices in Devon and Warwickshire, UK.

**Participants:** Four GPs and 29 patients; and four nurses and 22 patients requesting a same-day face-to-face appointment with a GP.

**Main outcome measure:** Form and content of practitioner-initiated questions and patient responses during clinical assessment.

**Results:** A total of 484 question-response sequences were coded (160 GP; 324 N). Despite average call lengths being similar (GP=4mins, 37secs, (SD=1mins, 26secs); N=4mins, 39secs, (SD=2mins, 22secs)), GPs and nurses differed in the average number (GP=5.51, (SD=4.66); N=14.72, (SD=6.42)), the content and form of questions asked. A higher frequency of questioning in nurse-led triage was found to be due to nurses' use of CDSS to guide telephone triage. Eighty-nine per cent of nurse questions were oriented to asking patients about their reported complaint or to wider-information gathering, compared to 54% of GP questions. Forty-three percent of GP questions involved eliciting patient concerns or expectations, and obtaining details of past medical history, compared to 11% of nurse questions. Nurses using CDSS frequently delivered questions designed as declarative statements requesting confirmation and which typically preferred a 'no problem' response.

1  
2  
3 In contrast, GPs asked a higher proportion of interrogative questions designed to request  
4  
5 information.  
6

7  
8 **Conclusions:** Nurses and GPs emphasise different aspects of the clinical assessment process  
9  
10 during telephone triage. These different styles of triage have implications for the type of  
11  
12 information available following nurse or doctor-led triage, and for how patients experience  
13  
14 triage.  
15  
16  
17  
18  
19

#### 20 **ARTICLE SUMMARY**

##### 21 **Strengths and limitations of this study**

- 22 • Strengths of this study are that it is the first study to provide naturally occurring  
23 audio and video data directly comparing nurse-led and GP-led triage. It provides  
24 clear evidence that computer decision support software (CDSS) organises nurse  
25 questioning, creating very different triage interactions to GPs not using CDSS.  
26
- 27 • This study was limited by the inclusion of only two GP practices. Given further  
28 training in the use of CDSS, the nurses in this study might also have conducted  
29 triage differently.  
30
- 31 • The different styles of triage we observed have implications for the type of  
32 information collected from patients, and for how patients experience triage.  
33  
34

## INTRODUCTION

The use of the telephone to triage patients requesting same-day appointments represents one strategy to manage the increasing workload taking place in primary care<sup>1</sup>. Whilst there is some evidence that telephone triage may reduce GP workload<sup>2,3</sup>, there is equivocal evidence that telephone triage is a safe<sup>4-7</sup> and satisfactory means of delivering care to patients<sup>3,8</sup>.

Research comparing how GPs and nurses communicate with patients within face-to-face consultations has identified patterned differences in the process of assessing patients and in the opportunities afforded to patients to explain their presenting problems<sup>9</sup>. Richards et al.<sup>10</sup> used GPs and nurses to retrospectively assess audio-taped nurse-led telephone triage, and found that GPs and nurses had only moderate levels of agreement on the level of information sought by nurses and on the appropriateness of triage outcome. A recent study using conversation analytic methods to compare doctor-patient consultations conducted face-to-face and on the telephone<sup>11</sup> found little difference in consultation styles between the two methods of delivering care, but found that patients differed in the number and complexity of topics introduced on the telephone compared with face-to-face consultations.

The role of computer decision support software (CDSS) and the professionals who use it is central to assessing the safety and effectiveness of telephone triage. In primary care, CDSS is promoted as supporting the clinical expertise of nurses to conduct triage<sup>12</sup>, representing a substitute for the expertise provided by GPs who do not use CDSS to triage patients. Whilst there is evidence that using CDSS to support clinical decisions is a safe and effective means of triaging patients<sup>13</sup>, other research suggests that nurses orientate to potential dissonance

1  
2  
3 between CDSS question-prompts and the specific circumstances of the caller's concern<sup>14</sup>;  
4  
5 interact with both the patient and the CDSS in 'purposive interaction chains'<sup>15</sup>; or regularly  
6  
7 deviate from and modify CDSS prompted questions, potentially leading to a divergence  
8  
9 rather than standardisation in triage outcomes<sup>16</sup>.

10  
11  
12  
13  
14 A recent retrospective case review of closed malpractice claims regarding telephone-related  
15  
16 consultations in the United States<sup>17</sup> found that 38% of litigation cases were because of  
17  
18 problems with communication. Reporting on cases involving clinicians from a range of  
19  
20 professional disciplines, Katz et al suggested that as workload increases, clinicians may rush  
21  
22 through triage and in some cases patients may be doing the triage rather than the clinician.  
23  
24 If nurse/GP triage is to be widely used within primary care in the UK there is a need for  
25  
26 greater insight into patient-clinician telephone communication that is both safe and  
27  
28 acceptable to patients. To date there has been no research that has directly compared  
29  
30 telephone triage communication of nurses using CDSS with GPs conducting telephone triage  
31  
32 without the additional support of CDSS.  
33  
34  
35  
36  
37  
38  
39  
40

41 We compared communication between GP-led and nurse-led computer-supported  
42  
43 telephone triage in primary care. We proposed to contribute an understanding of the 'real-  
44  
45 time' use of telephone triage in primary care by both nurses and GPs. In this article, we  
46  
47 focus on a key element of telephone triage – the interrogative series driving the process of  
48  
49 clinical assessment, - a crucial source of information to support decision-making about  
50  
51 triage outcomes.  
52  
53  
54  
55  
56

## 57 PARTICIPANTS AND METHODS

1  
2  
3 The research was a sub-study, and formed part of the recruitment process for the ESTEEM  
4 trial<sup>18</sup>, the first multi-centre randomised controlled trial to compare GP-led vs. nurse-led  
5 telephone triage vs. usual care for UK patients requesting same-day appointments. Five  
6  
7 intervention practices were approached (2 Nurse, 3 GP), from whom two were successfully  
8  
9 recruited (1 Nurse, 1 GP). Four Nurses and four GPs participated. Participating practices  
10  
11 were not systematically triaging patients prior to their inclusion in ESTEEM and therefore  
12  
13 nurses had to be trained in the use of CDSS prior to commencing the trial. However, data for  
14  
15 the sub-study were not collected until practices were in their final week (average 8 weeks  
16  
17 post training in CDSS) of participation in ESTEEM. Patients (or their proxy) who phoned their  
18  
19 surgery requesting a same-day, face-to-face appointment with a GP were eligible for  
20  
21 participation. Patients were excluded from the sub-study if they did not fulfill the criteria for  
22  
23 inclusion to the main ESTEEM trial<sup>18</sup>, including:

- 24 - Patients who were (i) too ill to participate; (ii) unable to speak English; (iii) temporary  
25 residents.
- 26 - Young people aged 12.0-15.9 years.
- 27 - Children under 12 years unless a proxy phoned on their behalf.

28  
29  
30  
31  
32  
33  
34  
35  
36  
37  
38  
39  
40  
41  
42  
43 Over a two-day period in each practice, 81 audio-recordings of telephone triage (47 Nurse,  
44  
45 34 GP) and 35 video-recordings of Nurses' use of Odyssey CDSS were made. Written consent  
46  
47 was given by patients to analyse 51 complete recorded calls (22 Nurse, 29 GP) including 10  
48  
49 video-recordings. Video-recordings were synchronized with audio-recordings to enable  
50  
51 analysis of how nurses used Odyssey during triage. Demographic data collected as part of  
52  
53 the ESTEEM trial were also extracted for consented patients. Call length was determined by  
54  
55 length of recording which began as soon as the patient picked up the telephone and ended  
56  
57  
58  
59  
60

1  
2  
3 at the call close. Forty females (17 Nurse, 23 GP) and 11 males participated, with an average  
4  
5 age of 44 years (SD= 25) – see Table 1. In addition, triage outcome was collected for all  
6  
7  
8 consenting patients – see Table 2.  
9

## 10 11 12 **Analysis**

13  
14 All calls were transcribed in detail according to standard conversation analytic conventions<sup>19</sup>  
15  
16 (see Box 2 for transcription key). Call lengths were measured from audio-recordings. We  
17  
18 adapted an established conversation-analytic coding scheme for analysis of question-  
19  
20 response sequences<sup>20</sup>. Inclusion criteria for the coding scheme were:  
21  
22

- 23 - Questions had to be either (or both) a formal question (i.e., it had to rely on lexico-  
24 morpho-syntactic or prosodic interrogative marking) or a functional question (i.e., it  
25 had to effectively seek to elicit information, confirmation or agreement whether or  
26 not they made use of an interrogative sentence type);  
27  
28
- 29 - Questions seeking acknowledgment were **not** coded because they sought not  
30 neither confirmation nor affirmation;  
31  
32
- 33 - Repair questions (“Pardon”) as well as partial repeats (“He went where?”) were **not**  
34 coded;  
35  
36
- 37 - Questions that suggest, propose, or offer something to another as well as questions  
38 that request something from another were **not** coded (e.g. “Can I just confirm your  
39 date of birth before we go any further” or “Just bear with a moment we’ll see what  
40 we can have a look at for you”).  
41  
42  
43  
44  
45  
46  
47  
48  
49  
50  
51  
52  
53  
54

55 The scheme included 12 coding categories (see Box 1), including question design, the action  
56 they performed and the responses elicited. We also coded for an additional dimension of  
57  
58  
59  
60



1  
2  
3 the broader activity questions were oriented towards. Working from the inclusion criteria  
4  
5 with audio-recordings and transcripts, all eligible questions were identified and agreed by  
6  
7 JM, RB and JP (n=484). Two raters (JM, RB) then each independently coded 10% of  
8  
9 questions to determine inter-rater reliability. Kappa scores were calculated for all coding  
10  
11 categories revealing moderate to high levels of agreement (0.67-1.00). JM coded the  
12  
13 remaining data and ambiguous cases were discussed in order to reach a consensus on the  
14  
15 final code. JM, RB and JP then closely examined prototypical cases identified in the coding of  
16  
17 question-response sequences and which demonstrated recurrent patterns of interaction  
18  
19 across the consultations.  
20  
21  
22  
23  
24  
25  
26

27 **Box 1: Question-Response coding scheme (adapted from Stivers & Enfield 2010)**

- 28 • Semantic structure
- 29 • Through-produced multi-questions
- 30 • Polar questions –turn-final element; negative marking; declarative
- 31 • Type of Q-word in content Wh- questions
- 32 • Social action of question
- 33 • Response type
- 34 • Response timing
- 35 • Confirming or disconfirming answer to polar question
- 36 • Form of answer to polar question

37 Added for analysis of triage interactions:

- 38 • Question activity – reported complaint; wider-information gathering; eliciting  
39 patient explanations, views; past medical history

**Box 2: Transcription conventions<sup>19</sup>**

|               |                                                                                                                                                                                                  |
|---------------|--------------------------------------------------------------------------------------------------------------------------------------------------------------------------------------------------|
| (.)           | A micropause, hearable but too short to measure.                                                                                                                                                 |
| >he said<     | 'greater than' and 'lesser than' signs enclose speeded-up talk. Occasionally they are used the other way round for slower talk.                                                                  |
| Underlining   | indicates emphasis; the extent of underlining within individual words locates emphasis and also indicates how heavy it is.                                                                       |
| ↑ ↓           | Vertical arrows precede marked pitch movement, over and above normal rhythms of speech. They are used for notable changes in pitch beyond those represented by stops, commas and question marks. |
| she wa::nted  | Colons show degrees of elongation of the prior sound; the more colons, the more elongation.                                                                                                      |
| [ ]           | Square brackets mark the start and end of overlapping speech. They are aligned to mark the precise position of overlap as in the example below.                                                  |
| °↑I know it,° | 'degree' signs enclose hearably quieter speech.                                                                                                                                                  |

**RESULTS****Question Activity**

Average call length (minutes:seconds – mean, standard deviation, range) was similar across both arms, (Nurse-led = 4:39, 2:22, 1:45-10:46; GP-led = 4:37, 1:26, 1:29-8:14). However, nurses asked patients an average of 14.7 (SD = 6.4, range = 4-28) questions to assess the problem during telephone triage consultations, in contrast to only 5.5 (SD = 4.6, range = 0-17) asked by GPs. Nurses were predominantly oriented towards two types of question activity (Table 3) – the assessment of the patient's reported complaint (Nurse 32.1%; GP 21.9%) and wider information gathering around the reported complaint (Nurse 56.8%; GP 32.5%). In contrast, GP questions were more evenly distributed across four types of question activity, including eliciting patient's own explanations for their symptoms (Nurse 2.5%; GP 13.1%) - e.g. *There's no obvious explanation for that?* and seeking a more detailed

1  
2  
3 past medical history from the patient (Nurse 8.6%; GP 30.0%) – e.g. *What do you attend the*  
4  
5 *hospital for?*  
6  
7  
8  
9

10 **Table 1: Call Sample**

| 11 <b>Call Sample Descriptors</b> | 12 <b>Nurse-Led</b> | 13 <b>GP-Led</b> |
|-----------------------------------|---------------------|------------------|
| 14 Male                           | 15 5                | 16 6             |
| 17 Female                         | 18 17               | 19 23            |
| 20 Mean patient age (years)       | 21 45.2             | 22 44.7          |
| 23 Patient age range (years)      | 24 1.4-88.4         | 25 0.2-80.6      |
| 26 Calling on own behalf          | 27 17               | 28 22            |
| 29 Calling on behalf of other     | 30 5                | 31 7             |
| 32 Unknown problem                | 33 18               | 34 18            |
| 35 Known problem                  | 36 5                | 37 11            |
| 38 Single-issue problem           | 39 22               | 40 23            |
| 41 Multiple problems              | 42 0                | 43 6             |

44  
45  
46  
47  
48  
49  
50  
51  
52  
53  
54  
55  
56  
57  
58  
59  
60

**Table 2: Triage Outcome**

| Triage Outcome       | Nurse-Led | GP-Led |
|----------------------|-----------|--------|
| Same Day with nurse  | 10        | 2      |
| Same Day with GP     | 6         | 18     |
| Nurse or GP next day | 3         | 0      |
| Nurse or GP 3-7 days | 1         | 1      |
| Self-Care            | 2         | 3      |
| Nurse or GP >7 days  | 0         | 5      |

**Question Design and Action**

Over three-quarters of questions deployed by GPs and Nurses (Nurse 82.1% GP 76.3%) were polar questions. A key feature of polar questions is that they are designed for either a yes or no response<sup>21</sup>. Secondly, polar questions are commonly employed in medical history-taking where they are frequently designed to prefer a 'no problem' response. For example the inclusion of the negative polarity item 'at all' tilts, *Has she a temperature at all?* to prefer a *no* and therefore the absence of fever (an optimal state of affairs). In contrast *And you're breathing normally?* prefers a *yes* response and therefore the absence of breathing problems (again an optimal state of affairs). GPs used a higher proportion of polar questions with an interrogative design (Nurse 29.94% GP 46.25%) – e.g. *Have you vomited at all?* whilst over half of the nurses' polar questions were designed as declarative statements (Nurse 52.16% GP 30%) with a presupposed answer embodied within the question for confirmation or disconfirmation – e.g. *passing urine okay?* The proportion of polar,

1  
2  
3 declarative questions used by nurses is also reflected in the proportion of questions that  
4  
5 nurses asked that requested caller confirmation (Nurse 53.7% GP 31.87%). This stood out in  
6  
7 contrast to GPs predominantly asking questions that requested information rather than  
8  
9 confirmation (Nurse 45.99% GP 68.13%).  
10  
11

12  
13  
14 Nurses using CDSS, were therefore deploying a higher proportion of declarative questions  
15  
16 about the patient's reported complaint or wider-information gathering than GPs, designed  
17  
18 to optimise the report of the patient's situation by ruling out a variety of medical problems  
19  
20 (Nurse 45.37% GP 12.51%). In contrast, GPs, not using CDSS and therefore more able to self-  
21  
22 determine their questions, employed questions more evenly distributed across the four  
23  
24 different activities, typically designed as interrogatives aimed at requesting information  
25  
26 from the caller. In order to reveal the implications of these different distributions for how  
27  
28 GPs and Nurses, using CDSS, conducted telephone triage in our sample it is necessary to  
29  
30 examine how these differences in question number, activity, design and action are  
31  
32 consequential within the triage interactions themselves.  
33  
34  
35  
36  
37  
38  
39  
40  
41  
42  
43  
44  
45  
46  
47  
48  
49  
50  
51  
52  
53  
54  
55  
56  
57  
58  
59  
60

Table 3: Interrogative Series – Coding for Question Activity, Design and Action

| Activity                                                                                                                                     | Nurse            | GP               |
|----------------------------------------------------------------------------------------------------------------------------------------------|------------------|------------------|
| Reported Complaint<br><i>E.g. Is he getting more breathless?</i>                                                                             | 32.1%            | 21.9%            |
| Wider information gathering<br><i>E.g. and have you got a temperature at all do you feel hot?</i>                                            | 56.8%            | 32.5%            |
| Eliciting patient's concerns/ideas/expectations<br><i>E.g. There's no obvious explanation for that?</i>                                      | 2.5%             | 13.1%            |
| Past Medical history<br><i>E.g. And is there any family history of arthritis of any sort?</i>                                                | 8.6%             | 30.0%            |
| <b>Design</b>                                                                                                                                |                  |                  |
| Polar Questions - interrogative<br><i>E.g. Has she vomited at all</i><br>(Reported complaint & Wider-info gathering activities only)         | 29.9%<br>(25.9%) | 46.3%<br>(26.3%) |
| Polar Questions - declarative<br><i>E.g. And she's weeing okay</i><br>(Reported complaint & Wider-info gathering activities only)            | 52.2%<br>(45.4%) | 30.0%<br>(12.5%) |
| Content WH- questions<br><i>E.g. And when did the tiredness first start</i>                                                                  | 13.3%            | 18.8%            |
| Alternative questions<br><i>E.g. Is it quite bad or just a little bit of dizziness</i>                                                       | 4.6%             | 5.0%             |
| <b>Action</b>                                                                                                                                |                  |                  |
| Request for confirmation<br><i>E.g. And you said no discharge and no pain</i><br>(Reported complaint & Wider-info gathering activities only) | 53.7%<br>(46.6%) | 31.9%<br>(13.8%) |
| Request for information<br><i>E.g. Do you wear glasses or contact lenses?</i><br>(Reported complaint & Wider-info gathering activities only) | 46.0%<br>(42.3%) | 68.1%<br>(40.6%) |

### Gathering information during Nurse-led triage: a 'no problem' question series

When patients present a problem to clinicians, they may report several symptoms. Nurses, using Odyssey CDSS, need to select one of these symptoms and enter a key word to activate the CDSS for conducting triage with the patient. This activates a pop-up box with a series of symptom-related questions that prompt the nurse to ask of the patient. The nurse can select which questions to ask first but it is important the nurse asks those with a red or orange flag positioned adjacent to the question. Red-flagged questions have a default setting at the highest level of urgency and therefore if left unanswered Odyssey will recommend an emergency response. For each question asked, Odyssey prompts a set of responses in an additional pop-up box from which the nurse must select one. Odyssey therefore imposes an organisational structure on nurse questioning that is absent from GP-led triage. This structure is in terms of the number and order in which questions are asked, but also how questions are designed to elicit a response from patients that fits those offered by Odyssey.

The sequence and screenshot in Box 3 illustrates an interrogative series common to the wider information gathering activity in nurse consultations, using polar questions which firstly constrain the type of response available to patients and secondly are designed to prefer 'no problem' type responses. In this sequence the caller is a mother of an infant who has a high temperature. The nurse has activated the CDSS using the keyword 'high temperature' which has led to the CDSS prompting the nurse to ask the caller about vomiting. This first question is a fully formed interrogative, with the negative polarity item 'at all' preferring a *no* response, indicating the nurse presupposing an absence (and therefore 'no problem') rather than presence of vomiting. The preferred response is

1  
2  
3 therefore one that should be brief (yes/no) but one which also informs the nurse of the  
4  
5 absence rather than presence of vomiting, which will enable a quick transition to the next  
6  
7 topic. The mother offers the preferred response with a partial repeat of the nurse's question  
8  
9 'No, she hasn't'. The nurse is then able move on to the next item in the list of prompted  
10  
11 questions, 'but she is taking fluids'. This time the nurse's question is designed as a  
12  
13 declarative with an optimized presupposition aimed at obtaining confirmation. The mother  
14  
15 again responds with a short reiteration of the nurse's statement, functioning to confirm that  
16  
17 the nurse's presupposition is correct 'Yes she's drinking some water'. The same question  
18  
19 design is then repeated 'and she's weeing okay'. Again the mother repeats the nurse's  
20  
21 words and confirms 'Yes she's weeing absolutely fine'. The nurse then switches to a  
22  
23 negative declarative design presupposing an absence of a rash and again we can see the  
24  
25 mother follows the same pattern. However, following the nurse's next question, we see a  
26  
27 slight variation in the mother's response. The nurse again presents a negative declarative  
28  
29 question 'she's not coughing', but this time the patient appears to disconfirm the nurse's  
30  
31 presupposition. However, this is not a direct disconfirmation (e.g. *Yes she is coughing*) but  
32  
33 instead the mother qualifies her response - *not a constant cough*, functioning to uphold the  
34  
35 nurse's presupposition as at least partially correct. Finally, the negative declarative 'no other  
36  
37 problems normally' is issued with the mother repeating the previous pattern, confirming the  
38  
39 optimized presupposition that there are 'no other problems.'

40  
41 This example was typical of how nurses could be seen to manage the demands of the CDSS  
42  
43 prompts by adapting questions that enabled swift progression through the consultation. The  
44  
45 use of *And* to preface questions, use of multiple declaratives, optimized for confirmation,  
46  
47 and a process of ellipsis whereby questions were shortened made this information  
48  
49  
50  
51  
52  
53  
54  
55  
56  
57  
58  
59  
60



gathering activity appear more as a checklist designed to rule out serious difficulties rather than orienting to the patient's specific presenting problem. Consequently, contracted sequences of interactions with short turns, illustrated in Box 3, were a common feature in the nurse-led data but virtually absent in the GP-led data.

**Box 3: Nurse-Led triage – ‘no problem’ design questions**

N: **And has she vomited at all**

P: No (.) she hasn't no

N: **And >I know you ha-< you said you hadn't given her her a >bottle this morni-< but she is taki::ng (.)**

**flui::ds**

P: Yes she's drinking some (water)

N: **And she's weeing okay**

P: Yeah she's weeing absolutely fine

N: **No ra::sh?**

P: No no ra:sh

N: **O↑ka::y, (1.8) and no other symptoms she's not coughi::ng**

P: ↑She had a little cough this morning (3.2) but not a constant cough

N: **↑And ↑normally we:ll no other problems normaly::**

P: No she's normally fine running arou:nd like a,

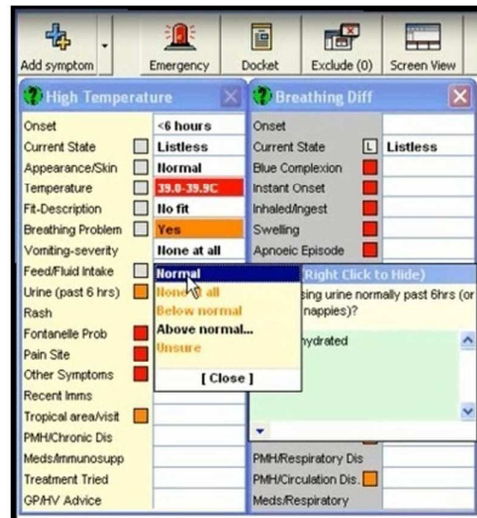

**At 1 minute, 45 seconds<sup>i</sup>**

In a few cases nurses could be seen to incorrectly presume a ‘no problem’ response from patients, resulting in some interactional difficulty whereby patients had to disconfirm the presupposition embodied in the question. In Box 4, an example is provided of a nurse asking about the radiation of pain, delivered as an optimised negative declarative statement for the patient to confirm. However there is a pause and then a non-straightforward response from the patient ‘We:ll...’ which serves to neither confirm or disconfirm the nurse’s presupposition. Even after referring to a previous statement and restating that there is some pain in the buttocks, the patient softens the weight of her disconfirmation with a

<sup>i</sup> The times here refer to the time that the extract begins in relation to the start of recording

further 'I don't know.' The effect is that the 'no problem' design in this case leads to a lack of clarity as to the location of the patient's presenting symptoms which is likely to be reflected in how the nurse records the patient's response in Odyssey.

**Box 4: Nurse-led triage - No problem design causing interactional difficulty**

N: **And you don't feel that it's moving down into the buttocks**  
(0.6)  
P: We::ll [I'd say it] (0.6) well I don't kno:::w it =  
N: [(? ) ]  
P: =(.) it's as I sa:y it ha- halfway do::wn the buttock an- (.) not so far in I would think  
I don't ↑know  
N: Okay that's fi::ne

**At 1 minute, 53 seconds**

**GP-led triage: Questions designed to elicit patient's explanations**

In contrast to the exhaustive CDSS-led questioning about the nature of the reported complaint and wider information gathering around it apparent within the nurse-triage data, GPs were frequently observed eliciting patient's explanations for their symptoms. In the extract outlined in Box 5 it is evident that early on in the triage consultation, and immediately following the patient's reported complaint, the GP attempts to rule out any obvious explanations from the patient. Following an initial marked confirmation, the patient takes this opportunity to list the candidate explanations she has considered and the GP then moves straight to triage resolution. Importantly, despite the GP using polar declarative questions that request confirmation, they are orientated to the ongoing talk and caller's responses rather than presented as a series of checklist-style questions.

Interactions where patient's explanations were oriented to and followed up by the GP, were very rare in the nurse triage data and indicate GPs and nurses orientating to different

aspects of the assessment process during triage. Box 5 provides an example of the potential of orienting to patient's explanations for determining triage outcome more efficiently, without an exhaustive interrogative series delivered through the use of the CDSS. However, we observed many instances of GPs and patients engaging in lengthy discussions about the possible causes of symptoms as well as GPs obtaining a detailed wider history from the patient both of which were less common in the nurse data. By contrast, nurses using CDSS did not engage in lengthy discussions about possible diagnoses even when one was offered by the patient, instead confined to the information gathering demands of the CDSS.

**Box 5: GP-led triage - Eliciting patient explanations**

P: =on it woke up this morning and my who::le (.) my whole eye and the whole left hand side of my face is complete swollen, my ↑eyes almost closed,

D: °Okay° (.) **and there's no obvious explanation for that y-**

P: Not at all

D: °No okay°

P: No I haven't I haven't suffered it, (.) y- y::ou know >I don't suffer with< hay feve:r (.) haven't been anywhe::re (.) unusual or y- y- you kno::w didn't [walk the dogs in any (field)]

D: [(?) ] **(o:r) or got anything in the eye or anything**

**like that**

P: No: (>got to admit<) I went to be:d at half past ten (.) perfectly fi::ne (.) and m- I do sleep with my window slightly open

D: °Yep°

P: Um a::nd (04.) went straight to sleep within an hour I just sat bolt upright (0.4) with >this like< ↑burning sensa↑tion,

D: Okay (.) I think we're gonna need to take a look at you .hh can you [come] in this morning?

**At 0 minutes, 14 Seconds**

**Nurse-led triage without CDSS**

On a few occasions the Odyssey software was not activated during the recorded nurse-led calls. In these cases, question-response sequences were identified that did not follow the same pattern as those where CDSS was in use. Box 6 provides an example of a sequence where the nurse, not using CDSS, begins the wider information gathering activity with a

1  
2  
3 typical opening question about duration followed by a declarative question designed to  
4  
5 confirm previous patient information. However, instead of then asking a series of questions  
6  
7 aimed at gathering information on related symptoms, the nurse proposes a candidate  
8  
9 diagnosis. In a similar way to the GP data, this potential diagnosis is then negotiated with  
10  
11 the patient within the ongoing interaction.  
12  
13

14  
15  
16  
17 **Box 6: Nurse offering diagnosis when not using CDSS**

18  
19 N: an ongoing, (.) she's had a (.) recent viral illness

20 P: Yeah

21 N: And she's pulling at her (0.6) ea::r is ↑it?

22 P: Yea:h, (.) both of them

23 N: Is she [teething]?

24  
25 **At 1 minute, 3 seconds**  
26  
27

28  
29  
30  
31 **DISCUSSION**

32  
33 Despite nurses asking three times as many questions as GPs, the similarity in the duration of  
34  
35 triage calls is explained by the content and form of questions used and their different  
36  
37 interactional consequences. Most notably, nurses' frequent use of 'no-problem' polar  
38  
39 declaratives requesting confirmation, deployed predominantly to gather information around  
40  
41 the reported complaint, created contracted question-response sequences. These features  
42  
43 were almost completely absent in the GP data where more polar interrogatives were  
44  
45 employed to request information from patients, taking a more unknowing stance and  
46  
47 allowing more room for elaboration or sequence expansion<sup>21</sup>. GP questions also launched a  
48  
49 wider range of activities including eliciting patients' own views and obtaining a relevant past  
50  
51 medical history. This differential distribution of question design, action and activities in the  
52  
53 GP data led to typically longer patient responses and subsequently to other kinds of  
54  
55  
56  
57  
58  
59  
60

1  
2  
3 practitioner contribution such as GP's own evaluations, patient education or advice. The  
4  
5 nurses, using CDSS, and GPs, self-determining their questions, could therefore be  
6  
7 considered to promote different aspects of the clinical assessment process during telephone  
8  
9 triage. Whilst nurses' focus on current symptoms emphasised an assessment of urgency and  
10  
11 efficient risk management of the patient, GP's attempts to elicit patient's own explanations  
12  
13 and obtain a wider past medical history demonstrated more familiar consultation  
14  
15 behaviours<sup>22</sup>.  
16  
17  
18  
19  
20

21  
22 The interactional differences observed in our sample reveal that nurse-led telephone triage,  
23  
24 using CDSS, is not a straightforward like-for-like substitution for GP-led triage. The design of  
25  
26 nurse questions could be seen as an adaptive strategy to the constraints of the software. As  
27  
28 a result, their attempts to rule out more serious conditions, manifested as a series of linked  
29  
30 checklist-style questions that appeared closer to a social survey than a medical interaction  
31  
32 orientated to patient's specific problems. This is reflected in the findings of the ESTEEM  
33  
34 process evaluation<sup>23</sup> which found that some patients did not understand why nurses asked  
35  
36 so many questions during triage calls, revealing that patients experience triage differently  
37  
38 when conducted by a nurse using CDSS or a GP without CDSS.  
39  
40  
41  
42  
43  
44

45  
46 Our findings also demonstrate that GPs acting independently, and nurses using CDSS are  
47  
48 likely to obtain different types of information from patients. The differences in information  
49  
50 collected may have an impact on how GPs and nurses decide on management and  
51  
52 disposition, and also on how patients are assessed in any subsequent consultation following  
53  
54 the triage call. A key task for assessing the value of these different approaches therefore lies  
55  
56  
57  
58  
59  
60

1  
2  
3 in research that examines how the content of triage calls is used in, or informs, subsequent  
4  
5 face-to-face or other primary care consultations.  
6  
7

8  
9  
10 GPs have historically been cast as expert decision-makers and so it is perhaps not surprising  
11  
12 that their eliciting of patient perspectives and detailed history have been identified as  
13  
14 common features of both face-to-face and telephone consultations<sup>11</sup>. Patient-centred  
15  
16 consultation styles have been shown to lead to increased patient satisfaction, treatment  
17  
18 adherence and treatment outcomes<sup>24-28</sup> and it would therefore seem to be a logical style to  
19  
20 reproduce within triage calls. However, the primary aim of telephone triage is to manage  
21  
22 and direct patients within the healthcare system. GPs, when eliciting patient explanations,  
23  
24 may therefore contribute to longer triage times than might be necessary to determine the  
25  
26 triage outcome. Nurses using CDSS, by contrast, would appear to strictly adhere to the end  
27  
28 point of patient management and perhaps more efficiently determine the route patients  
29  
30 should take in primary care. However, using CDSS involves extensive questioning which may  
31  
32 also unnecessarily contribute to longer triage times. A key issue is therefore how these  
33  
34 different triage methods affect triage outcome and overall consultation time. The benefit of  
35  
36 GPs delivering a more patient-centred consultation during triage, or nurses focusing solely  
37  
38 on patient management, for patients and in terms of resources therefore remains unclear.  
39  
40  
41  
42  
43  
44  
45  
46  
47

#### 48 **Limitations and strengths of the study**

49  
50 This study was limited by the inclusion of only two GP practices. It is possible that nurses  
51  
52 and GPs conducting triage in other GP surgeries would have employed different patterns of  
53  
54 distribution of question designs, actions and activities to those reported here. It might also  
55  
56 be the case that given further training and experience of the CDSS, nurses would have  
57  
58  
59  
60

1  
2  
3 delivered different interactions from those we observed here. However, our findings clearly  
4  
5 demonstrate how the CDSS imposes a structure on the number, order and design of nurse's  
6  
7 questioning compared with GPs questioning. This is backed up by our observation of nurses'  
8  
9 different questioning pattern when not using CDSS. The resonance between nurses'  
10  
11 questioning in our data and interactions observed in NHS Direct consultations<sup>14</sup>; and the  
12  
13 GP's questioning style in our data and previous research on telephone consultations<sup>11</sup> also  
14  
15 indicates how our findings may be transferred to other primary care settings. Studies such  
16  
17 as the one reported here therefore offer important insights into the actual implementation  
18  
19 of telephone triage using different professionals, and how CDSS can organise telephone  
20  
21 triage interactions and patient experiences. Such insights can assist both with the training of  
22  
23 those professionals in conducting triage, help improve the design of CDSS systems, and  
24  
25 manage patient expectations.  
26  
27  
28  
29  
30  
31  
32

### 33 **CONCLUSION**

34  
35  
36 Our data suggests nurse triage using CDSS is not a straightforward substitution for GP triage  
37  
38 without CDSS. Computer decision support software, employing algorithms designed to  
39  
40 minimise risk, plays a fundamental role in organising nurse's questioning during triage  
41  
42 leading to differences in the number, content and form of questions used by GPs and  
43  
44 nurses. These differences have consequences for the type of information collected from  
45  
46 patients during triage calls and for how patients experience those calls. These findings are  
47  
48 based on a small sample and it is not known how these triage styles are linked to triage  
49  
50 outcomes. However, given the well-established relationship between consultation style and  
51  
52 outcomes in primary care, our findings provide important evidence for the training of staff  
53  
54 and for the design of CDSS in supporting staff to conduct telephone triage.  
55  
56  
57  
58  
59  
60

**ACKNOWLEDGEMENTS**

The authors would like to thank all patients, nurses and GPs for participating in this study.

**COMPETING INTEREST DECLARATION**

All authors have completed the ICMJE uniform disclosure form at [www.icmje.org/coi\\_disclosure.pdf](http://www.icmje.org/coi_disclosure.pdf) and declare: all authors had financial support from SW GP Trust for the submitted work; no financial relationships with any organisations that might have an interest in the submitted work in the previous three years; no other relationships or activities that could appear to have influenced the submitted work."

**FUNDING**

The study was funded by the South West GP Trust. Neither the funder nor the sponsor had a role in the design, data collection, analysis, interpretation, writing up, or decision to submit for publication, responsibility for which rested solely with the authors. The researchers were therefore independent from the funders in the conduct, analysis, write-up and dissemination of the study's findings.

The study was a sub-study to the ESTEEM trial. ESTEEM was funded by the NIHR Health Technology Assessment programme [project number 08/53/15]. HTA had no role in the design, data collection, analysis, interpretation, writing up, or decision to submit for publication, responsibility for which rested solely with the authors. The researchers were therefore independent from the funders in the conduct, analysis, write-up and dissemination of the study's findings.



1  
2  
3 The ESTEEM study will be published in full in Health Technology Assessment [volume and  
4  
5 issue number to be confirmed]. See the HTA programme website for further project  
6  
7 information. The ESTEEM report presents independent research commissioned by the  
8  
9 National Institute for Health Research [NIHR]. The views and opinions expressed by the  
10  
11 authors in this publication are those of the authors and do not necessarily reflect those of  
12  
13 the NHS, the NIHR, MRC, CCF, NETSCC, the HTA programme or the Department of Health'  
14  
15  
16  
17  
18  
19

### 20 **ETHICAL APPROVAL**

21  
22 The study was approved by the South West Research Ethics Committee, reference number:  
23  
24 09/H0202/53. All healthcare professionals and patients provided written consent before  
25  
26 taking part.  
27  
28  
29  
30

### 31 **REFERENCES**

- 32  
33  
34 1. Salisbury, C. et al. (2007) Impact of advanced access on access, workload, and  
35  
36 continuity: controlled before-and-after and simulated-patient study. *British Journal*  
37  
38 *of General Practice*, 57:608-14.  
39  
40  
41 2. Richards, D.A., Meakins, J., Tawfik, J., Godfrey, L., Dutton, E., Richardson, G. *et al.*  
42  
43 (2002) Nurse telephone triage for same day appointments in general practice:  
44  
45 Multiple interrupted time series trial of effect on workload and costs. *British Medical*  
46  
47 *Journal*, 325:1214-7.  
48  
49  
50 3. Jiwa, M., Mathers, N.J., & Campbell, M.J. (2002) The effect of GP telephone triage on  
51  
52 numbers seeking same-day appointments. *British Journal of General Practice*,  
53  
54 52:390-1.  
55  
56  
57  
58  
59  
60

- 1
- 2
- 3 4. Crouch, R., Woodfield, H., Dale, J., & Patel, A. (1997) Telephone assessment and
- 4
- 5 advice: a training programme. *Nursing Standard*, 11:41-4.
- 6
- 7
- 8 5. Holmstrom I. (2007) Decision aid software programs in telenursing: not used as
- 9
- 10 intended? Experiences of Swedish telenurses. *Nursing Health Sciences*, 9:23-8.
- 11
- 12 6. McKinstry, B. et al, (2010). The quality, safety and content of telephone and face-to-
- 13
- 14 face consultations: a comparative study. *Quality & Safety in Health Care*, 19(4), 298-
- 15
- 16 303.
- 17
- 18 7. Poole, S.R., Schmitt, B.D., Carruth, T., Peterson-Smith, A. & Slusarski, M. (1993) After-
- 19
- 20 hours telephone coverage: the application of an area-wide telephone triage and
- 21
- 22 advice system for paediatric practices. *Paediatrics*, 92:670-9.
- 23
- 24
- 25 8. McKinstry, B., Walker, J., Campbell, C., Heaney, D. & Wyke, S. (2002) Telephone
- 26
- 27 consultations to manage requests for same-day appointments: a randomised
- 28
- 29 controlled trial in two practices. *British Journal of General Practice*, 52:306-10.
- 30
- 31
- 32 9. Collins, S. (2005) Explanations in consultations: the combined effectiveness of
- 33
- 34 doctors' and nurses' communication with patients. *Medical Education*, 39(8), 785-
- 35
- 36 796.
- 37
- 38
- 39 10. Richards, D.A., Meakins, J., Tawfik, J., Godfrey, L., Dutton, E., Heywood, P. (2004)
- 40
- 41 Quality monitoring of nurse telephone triage: pilot study. *Journal of Advance*
- 42
- 43 *Nursing*, 47(5), 551-560.
- 44
- 45
- 46 11. Hewitt, H., Gafaranga, J. & McKinstry, B. (2010). Comparison of face-to-face and
- 47
- 48 telephone consultations in primary care: qualitative analysis. *British Journal of*
- 49
- 50 *General Practice*, 60(574), 341-347.
- 51
- 52
- 53 12. Plain Healthcare (2013). Odyssey TeleAssess. Retrieved July 2013, from
- 54
- 55 <http://www.plainhealthcare.co.uk/our-products/odyssey-range/teleassess>
- 56
- 57
- 58
- 59
- 60

- 1  
2  
3 13. Derkx, H.P. et al. (2008) Quality of clinical aspects of call handling at Dutch out of  
4  
5 hours centres: cross sectional national study, *British Medical Journal*, 337, sep12,  
6  
7 p.a1264.  
8  
9  
10 14. Pooler, J. (2010). *Technology and Talk in Calls to NHS Direct*. (PhD), Loughborough  
11  
12 University.  
13  
14 15. May, C. R., Mair, F., Finch, T., MacFarlane, A., Dowrick, C., Treweek, S., et al. (2009)  
15  
16 Development of a theory of implementation and integration: Normalization Process  
17  
18 Theory. *Implementation Science*, 4, 29.  
19  
20 21 16. Greatbatch, D., Hanlon, G., Goode, J., O'Cathain, A., Strangleman, T. & Luff, D. (2005)  
22  
23 Telephone triage, expert systems and clinical expertise. *Sociology of Health & Illness*,  
24  
25 27(6), 802-830.  
26  
27 28 17. Katz, H.P., Kaltsounis, D., Halloran, L. & Mondor, M. (2007) Patient Safety and  
29  
30 Telephone Medicine: Some Lessons from Closed Claim Case Review. *Journal of*  
31  
32 *General Internal Medicine*, 23(5): 517–522.  
33  
34 35 18. Campbell, J.L. et al. (2013) The effectiveness and cost effectiveness of telephone  
36  
37 triage of patients requesting same day consultations in general practice: a cluster  
38  
39 randomised controlled trial comparing nurse-led and GP-led management systems  
40  
41 (ESTEEM). *Trials*, 14:4 <http://www.trialsjournal.com/content/14/1/4>  
42  
43  
44 45 19. Jefferson, G. (2004). A Glossary of Transcript Symbols with an Introduction. In G.  
46  
47 Lerner (Ed.), *Conversation Analysis: Studies from the First Generation* (pp. 13-31).  
48  
49 Philadelphia: John Benjamins.  
50  
51 52 20. Stivers, T. Enfield, NJ. (2010) A coding scheme for question–response sequences in  
53  
54 conversation, *Journal of Pragmatics*, doi:10.1016/j.pragma.2010.04.002  
55  
56  
57  
58  
59  
60

- 1  
2  
3 21. Heritage, J. (2009) Questioning in Medicine. In A. F. Freed & S. Ehrlich (Eds.), *Why Do*  
4  
5 *You Ask?: The Function of Questions in Institutional Discourse*, New York: Oxford  
6  
7 University Press.  
8  
9  
10 22. Heritage, J. and Maynard, D.W. (2006) Introduction: Analyzing interaction between  
11  
12 doctors and patients in primary care encounters. In Heritage, J. and Maynard, D.  
13  
14 (eds.) *Communication in Medical Care: Interaction between primary care physicians*  
15  
16 *and patients*. Cambridge: Cambridge University Press.  
17  
18  
19 23. Campbell, J.L. (2013) Personal Communication by email, 11 October  
20  
21  
22 24. Bertakis D., Roter D., & Putnam S.M. (1991) The relationship of physician medical  
23  
24 interview style to patient satisfaction. *Journal of Family Practice*; 32:175-81.  
25  
26  
27 25. Little P., Everitt H., Williamson I., Warner G., Moore M., Gould C., et al. (2001)  
28  
29 Observational study of effect of patient centredness and positive approach on  
30  
31 outcomes of general practice consultations. *British Medical Journal*; 323:908-11.  
32  
33  
34 26. Roter, D.L., Hall, J.A., Katz, N.R. (1987) Relations between physicians' behaviours and  
35  
36 analogue patients' satisfaction, recall and impressions. *Medical Care*; 25:437-51.  
37  
38  
39 27. Roter, D.L., Hall, J.A., Kern, D.E., Barker, R., Cole, K.A., Roca, R.P. (1995) Improving  
40  
41 physicians' interviewing skills and reducing patients' emotional distress: a  
42  
43 randomized clinical trial. *Archives of Internal Medicine*; 155:1877-84.  
44  
45  
46 28. Stewart, M. (1984) What is a successful doctor-patient interview? A study of  
47  
48 interactions and outcomes. *Social Science & Medicine*; 19:167-75.  
49  
50  
51  
52  
53  
54  
55  
56  
57  
58  
59  
60



**Question design in Nurse and GP-Led Telephone Triage for  
Same-Day Appointment Requests: A Comparative  
Investigation**

|                                    |                                                                                                                                                                                                                                                                                                                                                                                                                                                                                                                       |
|------------------------------------|-----------------------------------------------------------------------------------------------------------------------------------------------------------------------------------------------------------------------------------------------------------------------------------------------------------------------------------------------------------------------------------------------------------------------------------------------------------------------------------------------------------------------|
| Journal:                           | <i>BMJ Open</i>                                                                                                                                                                                                                                                                                                                                                                                                                                                                                                       |
| Manuscript ID:                     | bmjopen-2013-004515.R1                                                                                                                                                                                                                                                                                                                                                                                                                                                                                                |
| Article Type:                      | Research                                                                                                                                                                                                                                                                                                                                                                                                                                                                                                              |
| Date Submitted by the Author:      | 28-Jan-2014                                                                                                                                                                                                                                                                                                                                                                                                                                                                                                           |
| Complete List of Authors:          | Murdoch, Jamie; University of East Anglia, School of Nursing Sciences<br>Barnes, Rebecca; Bristol University, Centre for Academic Primary Care,<br>School for Social and Community Medicine<br>Pooler, Jill; University of Exeter Medical School, Primary Care Research<br>Group<br>Lattimer, Valerie; UEA, School of Nursing Sciences<br>Fletcher, Emily; University of Exeter Medical School, Primary Care Research<br>Group<br>Campbell, John; University of Exeter Medical School, Primary Care<br>Research Group |
| <b>Primary Subject<br>Heading</b>: | Qualitative research                                                                                                                                                                                                                                                                                                                                                                                                                                                                                                  |
| Secondary Subject Heading:         | Communication, Nursing, General practice / Family practice                                                                                                                                                                                                                                                                                                                                                                                                                                                            |
| Keywords:                          | Telephone, Triage, PRIMARY CARE, conversation analysis, computer-<br>decision support software, UK                                                                                                                                                                                                                                                                                                                                                                                                                    |
|                                    |                                                                                                                                                                                                                                                                                                                                                                                                                                                                                                                       |

SCHOLARONE™  
Manuscripts

# Question design in Nurse and GP-Led Telephone Triage for Same-Day Appointment

## Requests: A Comparative Investigation

Jamie Murdoch<sup>1</sup>, Rebecca Barnes<sup>2</sup>, Jillian Pooler<sup>3</sup>, Val Lattimer<sup>1</sup>, Emily Fletcher<sup>3</sup>, John L. Campbell<sup>3</sup>

### Corresponding Author:

Dr Jamie Murdoch

School of Nursing Sciences, Edith Cavell Building, Faculty of Medicine and Health Sciences,

University of East Anglia, Norwich Research Park, Norwich NR4 7TJ

Telephone: 01603-597090

Fax: 01603-597019

Email: [Jamie.murdoch@uea.ac.uk](mailto:Jamie.murdoch@uea.ac.uk)

### Addresses

<sup>1</sup>School of Nursing Sciences, Edith Cavell Building, Faculty of Medicine and Health

Sciences, University of East Anglia, Norwich Research Park, Norwich NR4 7TJ

<sup>2</sup>Centre for Academic Primary Care, School for Social and Community Medicine, Canynge

Hall, 39 Whatley Road, Bristol BS8 2PS

<sup>3</sup>Primary Care Research Group, University of Exeter Medical School, Room 106, Smeall

Building, St Luke's Campus, University of Exeter, Magdalen Road, Exeter EX1 2LU

### Keywords:

Telephone; triage; communication; primary care; computer-decision support software;

conversation analysis; UK

**Word Count: 4334**

## Abstract

**Objective:** To compare doctors' and nurses' communication with patients in primary care telephone triage consultations.

**Design:** Qualitative comparative study of content and form of questions in 51 telephone triage encounters between practitioners (GPs= 29; nurses=22) and patients requesting a same-day appointment in primary care. Audio-recordings of nurse-led calls were synchronised with video recordings of nurse's use of computer decision support software (CDSS) during triage.

**Setting:** Two GP practices in Devon and Warwickshire, UK.

**Participants:** Four GPs and 29 patients; and four nurses and 22 patients requesting a same-day face-to-face appointment with a GP.

**Main outcome measure:** Form and content of practitioner-initiated questions and patient responses during clinical assessment.

**Results:** A total of 484 question-response sequences were coded (160 GP; 324 N). Despite average call lengths being similar (GP=4mins, 37secs, (SD=1mins, 26secs); N=4mins, 39secs, (SD=2mins, 22secs)), GPs and nurses differed in the average number (GP=5.51, (SD=4.66); N=14.72, (SD=6.42)), the content and form of questions asked. A higher frequency of questioning in nurse-led triage was found to be due to nurses' use of CDSS to guide telephone triage. Eighty-nine per cent of nurse questions were oriented to asking patients about their reported complaint or to wider-information gathering, compared to 54% of GP questions. Forty-three percent of GP questions involved eliciting patient concerns or expectations, and obtaining details of past medical history, compared to 11% of nurse questions. Nurses using CDSS frequently delivered questions designed as declarative statements requesting confirmation and which typically preferred a 'no problem' response.

1  
2  
3 In contrast, GPs asked a higher proportion of interrogative questions designed to request  
4  
5 information.  
6

7  
8 **Conclusions:** Nurses and GPs emphasise different aspects of the clinical assessment process  
9  
10 during telephone triage. These different styles of triage have implications for the type of  
11  
12 information available following nurse or doctor-led triage, and for how patients experience  
13  
14 triage.  
15  
16  
17  
18  
19

#### 20 **ARTICLE SUMMARY**

##### 21 **Strengths and limitations of this study**

- 22 • Strengths of this study are that it is the first study to provide naturally occurring  
23 audio and video data directly comparing nurse-led and GP-led triage. It provides  
24 clear evidence that computer decision support software (CDSS) organises nurse  
25 questioning, creating very different triage interactions to GPs not using CDSS.  
26
- 27 • This study was limited by the inclusion of only two GP practices. Given further  
28 training in the use of CDSS, the nurses in this study might also have conducted  
29 triage differently.  
30
- 31 • The different styles of triage we observed have implications for the type of  
32 information collected from patients, and for how patients experience triage.  
33  
34



## INTRODUCTION

Telephone triage is the process where calls, from people with a health care problem, are received, assessed and managed by giving advice or by referral to a more appropriate service<sup>1</sup>. It is increasingly being used internationally to help with the provision of out-of-hours care, manage demand for care, or provide an additional source of help and advice<sup>2</sup>. In the UK, the use of the telephone to triage patients requesting same-day appointments represents one strategy to manage the increasing workload taking place in primary care<sup>3</sup>. Nurses and general practitioners may provide telephone triage and consultation, with nurses typically trained to use computerised decision support software to provide this service, both in office hours and out-of-hours. Whilst there is some evidence that telephone triage may reduce GP workload<sup>4,5</sup>, there is equivocal evidence that telephone triage is a safe<sup>6-9</sup> and satisfactory means of delivering care to patients<sup>5,10</sup>. The quality of patient-clinician interaction during triage and telephone consultation is key to aspects of safety, effectiveness, patient experience<sup>2,11</sup> and, potentially, to health outcomes<sup>12</sup>. How clinicians communicate with patients and respond to their presenting concerns within telephone triage consultations is therefore central to decisions about its delivery within primary care.

Research comparing how GPs and nurses communicate with patients within face-to-face consultations has identified patterned differences in the process of assessing patients and in the opportunities afforded to patients to explain their presenting problems<sup>13</sup>. Richards et al.<sup>14</sup> used GPs and nurses to retrospectively assess audio-taped nurse-led telephone triage, and found that GPs and nurses had only moderate levels of agreement on the level of information sought by nurses and on the appropriateness of triage outcome. A recent study using conversation analytic methods to compare doctor-patient consultations conducted

1  
2  
3 face-to-face and on the telephone<sup>15</sup> found little difference in consultation styles between  
4  
5 the two methods of delivering care, but found that patients differed in the number and  
6  
7 complexity of topics introduced on the telephone compared with face-to-face consultations.  
8  
9

10  
11  
12 The role of computer decision support software (CDSS) and the professionals who use it is  
13  
14 central to assessing the safety and effectiveness of telephone triage. In primary care, CDSS is  
15  
16 promoted as supporting the clinical expertise of nurses to conduct triage<sup>16</sup>, representing a  
17  
18 substitute for the expertise provided by GPs who do not use CDSS to triage patients. Whilst  
19  
20 there is evidence that using CDSS to support clinical decisions is a safe and effective means  
21  
22 of triaging patients<sup>17</sup>, other research suggests that nurses orientate to potential dissonance  
23  
24 between CDSS question-prompts and the specific circumstances of the caller's concern<sup>18</sup>;  
25  
26 interact with both the patient and the CDSS in 'purposive interaction chains'<sup>19</sup>; or regularly  
27  
28 deviate from and modify CDSS prompted questions, potentially leading to a divergence  
29  
30 rather than standardisation in triage outcomes<sup>20</sup>.  
31  
32  
33  
34  
35  
36  
37

38  
39 A recent retrospective case review of closed malpractice claims regarding telephone-related  
40  
41 consultations in the United States<sup>21</sup> found that 38% of litigation cases were because of  
42  
43 problems with communication. Reporting on cases involving clinicians from a range of  
44  
45 professional disciplines, Katz et al suggested that as workload increases, clinicians may rush  
46  
47 through triage and in some cases patients may be doing the triage rather than the clinician.  
48  
49 In a similar analysis of calls to Swedish Healthcare Direct, Ernesater et al<sup>22</sup> reported that  
50  
51 failures in communication and asking the caller too few questions were commonly observed  
52  
53 in malpractice claims, a finding also reported in a Dutch study of simulated calls to out-of-  
54  
55 hours centres<sup>17</sup>.  
56  
57  
58  
59  
60

1  
2  
3  
4  
5 If nurse/GP triage is to be widely used within primary care in the UK there is therefore a  
6  
7 need for greater insight into patient-clinician telephone communication that is both safe  
8  
9 and acceptable to patients. To date there has been no research that has directly compared  
10  
11 telephone triage communication of nurses using CDSS with GPs conducting telephone triage  
12  
13 without the additional support of CDSS.  
14  
15

16  
17  
18  
19 We compared communication between GP-led and nurse-led computer-supported  
20  
21 telephone triage in primary care. We proposed to contribute an understanding of the 'real-  
22  
23 time' use of telephone triage in primary care by both nurses and GPs. In this article, we  
24  
25 focus on a key element of telephone triage – the interrogative series driving the process of  
26  
27 clinical assessment, - a crucial source of information to support decision-making about  
28  
29 triage outcomes.  
30  
31  
32  
33  
34  
35

### 36 **PARTICIPANTS AND METHODS**

37  
38 The research was a sub-study, and formed part of the recruitment process for the ESTEEM  
39  
40 trial<sup>23</sup>, the first multi-centre randomised controlled trial to compare GP-led vs. nurse-led  
41  
42 telephone triage vs. usual care for UK patients requesting same-day appointments. A  
43  
44 qualitative comparative study of nurse-led and GP-led triage consultations was used to  
45  
46 enable close analysis of interaction between clinicians and patients; and the role the CDSS  
47  
48 played in organising nurse-patient interactions.  
49  
50  
51  
52  
53  
54

55 Five intervention practices were approached (2 Nurse, 3 GP), from whom two were  
56  
57 successfully recruited (1 Nurse, 1 GP). Four Nurses and four GPs participated. Participating  
58  
59  
60

1  
2  
3 practices were not systematically triaging patients prior to their inclusion in ESTEEM and  
4  
5 therefore nurses had to be trained in the use of CDSS prior to commencing the trial.  
6  
7 However, data for the sub-study were not collected until practices were in their final week  
8  
9 (average 8 weeks post training in CDSS) of participation in ESTEEM. Patients (or their proxy)  
10  
11 who phoned their surgery requesting a same-day, face-to-face appointment with a GP were  
12  
13 eligible for participation. Patients were excluded from the sub-study if they did not fulfill the  
14  
15 criteria for inclusion to the main ESTEEM trial<sup>23</sup>, including:  
16  
17

- 18 - Patients who were (i) too ill to participate; (ii) unable to speak English; (iii) temporary  
19 residents.  
20  
21
- 22 - Young people aged 12.0-15.9 years.  
23  
24
- 25 - Children under 12 years unless a proxy phoned on their behalf.  
26  
27  
28  
29  
30

31 Over a two-day period in each practice, 81 audio-recordings of telephone triage (47 Nurse,  
32  
33 34 GP) and 35 video-recordings of Nurses' use of Odyssey CDSS were made. Written consent  
34  
35 was given by patients to analyse 51 complete recorded calls (22 Nurse, 29 GP) including 10  
36  
37 video-recordings. Video-recordings were synchronized with audio-recordings to enable  
38  
39 analysis of how nurses used Odyssey during triage. Demographic data collected as part of  
40  
41 the ESTEEM trial were also extracted for consented patients. Call length was determined by  
42  
43 length of recording which began as soon as the patient picked up the telephone and ended  
44  
45 at the call close. Forty females (17 Nurse, 23 GP) and 11 males participated, with an average  
46  
47 age of 44 years (SD= 25) – see Table 1. In addition, triage outcome was collected for all  
48  
49 consenting patients – see Table 2.  
50  
51  
52  
53  
54  
55  
56

## 57 Analysis

1  
2  
3 All calls were transcribed in detail according to standard conversation analytic conventions<sup>24</sup>  
4  
5 (see Box 2 for transcription key). Call lengths were measured from audio-recordings. This led  
6  
7 to identifying potentially important differences between the two groups in call length and  
8  
9 numbers of questions clinicians asked. In order to understand the nature of these  
10  
11 differences we adapted an established conversation-analytic coding scheme for analysis of  
12  
13 question-response sequences<sup>25</sup>. Conversation analysis is increasingly being used to support  
14  
15 medical research aimed at understanding the distribution of interactional practices by  
16  
17 offering operational definitions of phenomena that can subsequently be coded and  
18  
19 counted<sup>26</sup>. Inclusion criteria for the coding scheme were:  
20  
21  
22

- 23  
24 - Questions had to effectively seek to elicit information, confirmation or agreement  
25  
26 whether or not they made use of an interrogative sentence type);  
27  
28
- 29 - Questions seeking acknowledgment were **not** coded because they sought not  
30  
31 neither confirmation nor affirmation;  
32  
33
- 34 - Repair questions (“Pardon”) as well as partial repeats (“He went where?”) were **not**  
35  
36 coded;  
37  
38
- 39 - Questions that suggest, propose, or offer something to another as well as questions  
40  
41 that request something from another were **not** coded (e.g. “Can I just confirm your  
42  
43 date of birth before we go any further” or “Just bear with a moment we’ll see what  
44  
45 we can have a look at for you”).  
46  
47  
48

49  
50 The scheme included 12 coding categories (see Box 1), including question design, the action  
51  
52 they performed and the responses elicited. We also coded for an additional dimension of  
53  
54 the broader activity questions were oriented towards. Working from the inclusion criteria  
55  
56 with audio-recordings and transcripts, all eligible questions were identified and agreed by  
57  
58  
59  
60

1  
2  
3 JM, RB and JP (n=484). Two raters (JM, RB) then each independently coded 10% of  
4  
5 questions to determine inter-rater reliability. Kappa scores were calculated for all coding  
6  
7 categories revealing moderate to high levels of agreement (0.67-1.00). JM coded the  
8  
9 remaining data and ambiguous cases were discussed in order to reach a consensus on the  
10  
11 final code. JM, RB and JP then closely examined prototypical cases identified in the coding of  
12  
13 question-response sequences and which demonstrated recurrent patterns of interaction  
14  
15 across the consultations.  
16  
17  
18  
19  
20  
21

22 **Box 1: Question-Response coding scheme (adapted from Stivers & Enfield 2010)**

- 23
- 24 • Semantic structure
  - 25 • Through-produced multi-questions
  - 26 • Polar questions –turn-final element; negative marking; declarative
  - 27 • Type of Q-word in content Wh- questions
  - 28 • Social action of question
  - 29 • Response type
  - 30 • Response timing
  - 31 • Confirming or disconfirming answer to polar question
  - 32 • Form of answer to polar question

33 Added for analysis of triage interactions:

- 34 • Question activity – reported complaint; wider-information gathering; eliciting  
35 patient explanations, views; past medical history
- 36  
37  
38  
39  
40  
41  
42  
43  
44  
45  
46  
47  
48  
49  
50  
51  
52  
53  
54  
55  
56  
57  
58  
59  
60

**Box 2: Transcription conventions<sup>24</sup>**

|               |                                                                                                                                                                                                  |
|---------------|--------------------------------------------------------------------------------------------------------------------------------------------------------------------------------------------------|
| (.)           | A micropause, hearable but too short to measure.                                                                                                                                                 |
| >he said<     | 'greater than' and 'lesser than' signs enclose speeded-up talk. Occasionally they are used the other way round for slower talk.                                                                  |
| Underlining   | indicates emphasis; the extent of underlining within individual words locates emphasis and also indicates how heavy it is.                                                                       |
| ↑ ↓           | Vertical arrows precede marked pitch movement, over and above normal rhythms of speech. They are used for notable changes in pitch beyond those represented by stops, commas and question marks. |
| she wa::nted  | Colons show degrees of elongation of the prior sound; the more colons, the more elongation.                                                                                                      |
| [ ]           | Square brackets mark the start and end of overlapping speech. They are aligned to mark the precise position of overlap as in the example below.                                                  |
| °↑I know it,° | 'degree' signs enclose hearably quieter speech.                                                                                                                                                  |

**RESULTS****Question Activity**

Average call length (minutes:seconds – mean, standard deviation, range) was similar across both arms, (Nurse-led = 4:39, 2:22, 1:45-10:46; GP-led = 4:37, 1:26, 1:29-8:14). However, nurses asked patients an average of 14.7 (SD = 6.4, range = 4-28) questions to assess the problem during telephone triage consultations, in contrast to only 5.5 (SD = 4.6, range = 0-17) asked by GPs. Nurses were predominantly oriented towards two types of question activity (Table 3) – the assessment of the patient's reported complaint (Nurse 32.1%; GP 21.9%) and wider information gathering around the reported complaint (Nurse 56.8%; GP 32.5%). In contrast, GP questions were more evenly distributed across four types of question activity, including eliciting patient's own explanations for their symptoms (Nurse 2.5%; GP 13.1%) - e.g. *There's no obvious explanation for that?* and seeking a more detailed

1  
2  
3 past medical history from the patient (Nurse 8.6%; GP 30.0%) – e.g. *What do you attend the*  
4  
5 *hospital for?*  
6  
7  
8  
9

10 **Table 1: Call Sample**

| 11 <b>Call Sample Descriptors</b> | 12 <b>Nurse-Led</b> | 13 <b>GP-Led</b> |
|-----------------------------------|---------------------|------------------|
| 14 Male                           | 15 5                | 16 6             |
| 17 Female                         | 18 17               | 19 23            |
| 20 Mean patient age (years)       | 21 45.2             | 22 44.7          |
| 23 Patient age range (years)      | 24 1.4-88.4         | 25 0.2-80.6      |
| 26 Calling on own behalf          | 27 17               | 28 22            |
| 29 Calling on behalf of other     | 30 5                | 31 7             |
| 32 Unknown problem                | 33 18               | 34 18            |
| 35 Known problem                  | 36 5                | 37 11            |
| 38 Single-issue problem           | 39 22               | 40 23            |
| 41 Multiple problems              | 42 0                | 43 6             |

44  
45  
46  
47  
48  
49  
50  
51  
52  
53  
54  
55  
56  
57  
58  
59  
60



**Table 2: Triage Outcome**

| Triage Outcome       | Nurse-Led | GP-Led |
|----------------------|-----------|--------|
| Same Day with nurse  | 10        | 2      |
| Same Day with GP     | 6         | 18     |
| Nurse or GP next day | 3         | 0      |
| Nurse or GP 3-7 days | 1         | 1      |
| Self-Care            | 2         | 3      |
| Nurse or GP >7 days  | 0         | 5      |

**Question Design and Action**

Over three-quarters of questions deployed by GPs and Nurses (Nurse 82.1% GP 76.3%) were polar questions. A key feature of polar questions is that they are designed for either a yes or no response<sup>27</sup>. Secondly, polar questions are commonly employed in medical history-taking where they are frequently designed to prefer a 'no problem' response. For example the inclusion of the negative polarity item 'at all' tilts, *Has she a temperature at all?* to prefer a *no* and therefore the absence of fever (an optimal state of affairs). In contrast *And you're breathing normally?* prefers a *yes* response and therefore the absence of breathing problems (again an optimal state of affairs). GPs used a higher proportion of polar questions with an interrogative design (Nurse 29.94% GP 46.25%) – e.g. *Have you vomited at all?* whilst over half of the nurses' polar questions were designed as declarative statements (Nurse 52.16% GP 30%) with a presupposed answer embodied within the question for confirmation or disconfirmation – e.g. *passing urine okay?* The proportion of polar,

1  
2  
3 declarative questions used by nurses is also reflected in the proportion of questions that  
4  
5 nurses asked that requested caller confirmation (Nurse 53.7% GP 31.87%). This stood out in  
6  
7 contrast to GPs predominantly asking questions that requested information rather than  
8  
9 confirmation (Nurse 45.99% GP 68.13%).  
10  
11

12  
13  
14 Nurses using CDSS, were therefore deploying a higher proportion of declarative questions  
15  
16 about the patient's reported complaint or wider-information gathering than GPs, designed  
17  
18 to optimise the report of the patient's situation by ruling out a variety of medical problems  
19  
20 (Nurse 45.37% GP 12.51%). In contrast, GPs, not using CDSS and therefore more able to self-  
21  
22 determine their questions, employed questions more evenly distributed across the four  
23  
24 different activities, typically designed as interrogatives aimed at requesting information  
25  
26 from the caller. In order to reveal the implications of these different distributions for how  
27  
28 GPs and Nurses, using CDSS, conducted telephone triage in our sample it is necessary to  
29  
30 examine how these differences in question number, activity, design and action are  
31  
32 consequential within the triage interactions themselves.  
33  
34  
35  
36  
37  
38  
39  
40  
41  
42  
43  
44  
45  
46  
47  
48  
49  
50  
51  
52  
53  
54  
55  
56  
57  
58  
59  
60

Table 3: Interrogative Series – Coding for Question Activity, Design and Action

| Activity                                                                                                                                     | Nurse   | GP      |
|----------------------------------------------------------------------------------------------------------------------------------------------|---------|---------|
| Reported Complaint<br><i>E.g. Is he getting more breathless?</i>                                                                             | 32.1%   | 21.9%   |
| Wider information gathering<br><i>E.g. and have you got a temperature at all do you feel hot?</i>                                            | 56.8%   | 32.5%   |
| Eliciting patient's concerns/ideas/expectations<br><i>E.g. There's no obvious explanation for that?</i>                                      | 2.5%    | 13.1%   |
| Past Medical history<br><i>E.g. And is there any family history of arthritis of any sort?</i>                                                | 8.6%    | 30.0%   |
| <b>Design</b>                                                                                                                                |         |         |
| Polar Questions - interrogative<br><i>E.g. Has she vomited at all</i><br>(Reported complaint & Wider-info gathering activities only)         | 29.9%   | 46.3%   |
| Polar Questions - declarative<br><i>E.g. And she's weeing okay</i><br>(Reported complaint & Wider-info gathering activities only)            | 52.2%   | 30.0%   |
| Content WH- questions<br><i>E.g. And when did the tiredness first start</i>                                                                  | 13.3%   | 18.8%   |
| Alternative questions<br><i>E.g. Is it quite bad or just a little bit of dizziness</i>                                                       | 4.6%    | 5.0%    |
| <b>Action</b>                                                                                                                                |         |         |
| Request for confirmation<br><i>E.g. And you said no discharge and no pain</i><br>(Reported complaint & Wider-info gathering activities only) | 53.7%   | 31.9%   |
| Request for information<br><i>E.g. Do you wear glasses or contact lenses?</i><br>(Reported complaint & Wider-info gathering activities only) | 46.0%   | 68.1%   |
|                                                                                                                                              | (42.3%) | (40.6%) |

### Gathering information during Nurse-led triage: a 'no problem' question series

When patients present a problem to clinicians, they may report several symptoms. Nurses, using Odyssey CDSS, need to select one of these symptoms and enter a key word to activate the CDSS for conducting triage with the patient. This activates a pop-up box with a series of symptom-related questions that prompt the nurse to ask of the patient. The nurse can select which questions to ask first but it is important the nurse asks those with a red or orange flag positioned adjacent to the question. Red-flagged questions have a default setting at the highest level of urgency and therefore if left unanswered Odyssey will recommend an emergency response. For each question asked, Odyssey prompts a set of responses in an additional pop-up box from which the nurse must select one. Odyssey therefore imposes an organisational structure on nurse questioning that is absent from GP-led triage. This structure is in terms of the number and order in which questions are asked, but also how questions are designed to elicit a response from patients that fits those offered by Odyssey.

The sequence and screenshot in Box 3 (Figure 1) illustrates an interrogative series common to the wider information gathering activity in nurse consultations, using polar questions which firstly constrain the type of response available to patients and secondly are designed to prefer 'no problem' type responses. In this sequence the caller is a mother of an infant who has a high temperature. The nurse has activated the CDSS using the keyword 'high temperature' which has led to the CDSS prompting the nurse to ask the caller about vomiting. This first question is a fully formed interrogative, with the negative polarity item 'at all' preferring a *no* response, indicating the nurse presupposing an absence (and therefore 'no problem') rather than presence of vomiting. The preferred response is

1  
2  
3 therefore one that should be brief (yes/no) but one which also informs the nurse of the  
4  
5 absence rather than presence of vomiting, which will enable a quick transition to the next  
6  
7 topic. The mother offers the preferred response with a partial repeat of the nurse's question  
8  
9 'No, she hasn't'. The nurse is then able move on to the next item in the list of prompted  
10  
11 questions, 'but she is taking fluids'. This time the nurse's question is designed as a  
12  
13 declarative with an optimized presupposition aimed at obtaining confirmation. The mother  
14  
15 again responds with a short reiteration of the nurse's statement, functioning to confirm that  
16  
17 the nurse's presupposition is correct 'Yes she's drinking some water'. The same question  
18  
19 design is then repeated 'and she's weeing okay'. Again the mother repeats the nurse's  
20  
21 words and confirms 'Yes she's weeing absolutely fine'. The nurse then switches to a  
22  
23 negative declarative design presupposing an absence of a rash and again we can see the  
24  
25 mother follows the same pattern. However, following the nurse's next question, we see a  
26  
27 slight variation in the mother's response. The nurse again presents a negative declarative  
28  
29 question 'she's not coughing', but this time the patient appears to disconfirm the nurse's  
30  
31 presupposition. However, this is not a direct disconfirmation (e.g. *Yes she is coughing*) but  
32  
33 instead the mother qualifies her response - *not a constant cough*, functioning to uphold the  
34  
35 nurse's presupposition as at least partially correct. Finally, the negative declarative 'no other  
36  
37 problems normally' is issued with the mother repeating the previous pattern, confirming the  
38  
39 optimized presupposition that there are 'no other problems.'

40  
41 This example was typical of how nurses could be seen to manage the demands of the CDSS  
42  
43 prompts by adapting questions that enabled swift progression through the consultation. The  
44  
45 use of *And* to preface questions, use of multiple declaratives, optimized for confirmation,  
46  
47 and a process of ellipsis whereby questions were shortened made this information  
48  
49  
50  
51  
52  
53  
54  
55  
56  
57  
58  
59  
60

gathering activity appear more as a checklist designed to rule out serious difficulties rather than orienting to the patient's specific presenting problem. Consequently, contracted sequences of interactions with short turns, illustrated in Box 3, were a common feature in the nurse-led data but virtually absent in the GP-led data.

**Box 3 and Figure 1: Nurse-Led triage – 'no problem' design questions**

N: **And has she vomited at a:ll**

P: No (.) she hasn't no

N: And >I know you ha-< you said you hadn't given her her a >bottle this morni-< but **she is taki::ng (.)**

**flui::ds**

P: Yes she's drinking some (water)

N: **And she's weeing okay**

P: Yeah she's weeing absolutely fine

N: **No ra::sh?**

P: No no ra:sh

N: O<sup>↑</sup>ka::y, (1.8) **and no other symptoms she's not coughi::ng**

P: <sup>↑</sup>She had a little cough this morning (3.2) but not a constant cou:gh

N: **<sup>↑</sup>And <sup>↑</sup>normally we:ll no other problems normally::**

P: No she's normally fine running arou:nd like a,

**At 1 minute, 45 seconds<sup>i</sup>**

In a few cases nurses could be seen to incorrectly presume a 'no problem' response from patients, resulting in some interactional difficulty whereby patients had to disconfirm the presupposition embodied in the question. In Box 4, an example is provided of a nurse asking about the radiation of pain, delivered as an optimised negative declarative statement for the patient to confirm. However there is a pause and then a non-straightforward response from the patient 'We::ll...' which serves to neither confirm or disconfirm the nurse's presupposition. Even after referring to a previous statement and restating that there is some pain in the buttocks, the patient softens the weight of her disconfirmation with a

<sup>i</sup> The times here refer to the time that the extract begins in relation to the start of recording

further 'I don't know.' The effect is that the 'no problem' design in this case leads to a lack of clarity as to the location of the patient's presenting symptoms which is likely to be reflected in how the nurse records the patient's response in Odyssey.

**Box 4: Nurse-led triage - No problem design causing interactional difficulty**

N: **And you don't feel that it's moving down into the buttocks**  
(0.6)  
P: We::ll [I'd say it] (0.6) well I don't kno:::w it =  
N: [(?) ]  
P: =(.) it's as I sa:y it ha- halfway do::wn the buttock an- (.) not so far in I would think  
I don't ↑know  
N: Okay that's fi::ne

**At 1 minute, 53 seconds**

**GP-led triage: Questions designed to elicit patient's explanations**

In contrast to the exhaustive CDSS-led questioning about the nature of the reported complaint and wider information gathering around it apparent within the nurse-triage data, GPs were frequently observed eliciting patient's explanations for their symptoms. In the extract outlined in Box 5 it is evident that early on in the triage consultation, and immediately following the patient's reported complaint, the GP attempts to rule out any obvious explanations from the patient. Following an initial marked confirmation, the patient takes this opportunity to list the candidate explanations she has considered and the GP then moves straight to triage resolution. Importantly, despite the GP using polar declarative questions that request confirmation, they are orientated to the ongoing talk and caller's responses rather than presented as a series of checklist-style questions.

Interactions where patient's explanations were oriented to and followed up by the GP, were very rare in the nurse triage data and indicate GPs and nurses orientating to different

aspects of the assessment process during triage. Box 5 provides an example of the potential of orienting to patient's explanations for determining triage outcome more efficiently, without an exhaustive interrogative series delivered through the use of the CDSS. However, we observed many instances of GPs and patients engaging in lengthy discussions about the possible causes of symptoms as well as GPs obtaining a detailed wider history from the patient both of which were less common in the nurse data. By contrast, nurses using CDSS did not engage in lengthy discussions about possible diagnoses even when one was offered by the patient, instead confined to the information gathering demands of the CDSS.

**Box 5: GP-led triage - Eliciting patient explanations**

P: =on it woke up this morning and my who::le (.) my whole eye and the whole left hand side of my face is complete swollen, my ↑eyes almost closed,

D: °Okay° (.) **and there's no obvious explanation for that y-**

P: Not at all

D: °No okay°

P: No I haven't I haven't suffered it, (.) y- y::ou know >I don't suffer with< hay feve:r (.) haven't been anywhe::re (.) unusual or y- y- you kno::w didn't [walk the dogs in any (field)]

D: [(?) ] **(o:r) or**

**got anything in the eye or anything like that**

P: No: (>got to admit<) I went to be:d at half past ten (.) perfectly fi::ne (.) and m- I do sleep with my window slightly open

D: °Yep°

P: Um a::nd (04.) went straight to sleep within an hour I just sat bolt upright (0.4) with >this like< ↑burning sensa↑tion,

D: Okay (.) I think we're gonna need to take a look at you .hh can you [come] in this morning?

**At 0 minutes, 14 Seconds**

**Nurse-led triage without CDSS**

On a few occasions the Odyssey software was not activated during the recorded nurse-led calls. In these cases, question-response sequences were identified that did not follow the same pattern as those where CDSS was in use. Box 6 provides an example of a sequence where the nurse, not using CDSS, begins the wider information gathering activity with a



1  
2  
3 typical opening question about duration followed by a declarative question designed to  
4  
5 confirm previous patient information. However, instead of then asking a series of questions  
6  
7 aimed at gathering information on related symptoms, the nurse proposes a candidate  
8  
9 diagnosis. In a similar way to the GP data, this potential diagnosis is then negotiated with  
10  
11 the patient within the ongoing interaction.  
12  
13

14  
15  
16  
17 **Box 6: Nurse offering diagnosis when not using CDSS**

18  
19 N: an ongoing, (.) she's had a (.) recent viral illness

20 P: Yeah

21 N: And she's pulling at her (0.6) ea::r is ↑it?

22 P: Yea:h, (.) both of them

23 N: Is she [teething]?

24  
25 **At 1 minute, 3 seconds**  
26  
27

28  
29  
30  
31 **DISCUSSION**

32  
33 Despite nurses asking three times as many questions as GPs, the similarity in the duration of  
34  
35 triage calls is explained by the content and form of questions used and their different  
36  
37 interactional consequences. Most notably, nurses' frequent use of 'no-problem' polar  
38  
39 declaratives requesting confirmation, deployed predominantly to gather information around  
40  
41 the reported complaint, created contracted question-response sequences. These features  
42  
43 were almost completely absent in the GP data where more polar interrogatives were  
44  
45 employed to request information from patients, taking a more unknowing stance and  
46  
47 allowing more room for elaboration or sequence expansion<sup>27</sup>. GP questions also launched a  
48  
49 wider range of activities including eliciting patients' own views and obtaining a relevant past  
50  
51 medical history. This differential distribution of question design, action and activities in the  
52  
53 GP data led to typically longer patient responses and subsequently to other kinds of  
54  
55  
56  
57  
58  
59  
60

1  
2  
3 practitioner contribution such as GP's own evaluations, patient education or advice. The  
4  
5 nurses, using CDSS, and GPs, self-determining their questions, could therefore be  
6  
7 considered to promote different aspects of the clinical assessment process during telephone  
8  
9 triage. Whilst nurses' focus on current symptoms emphasised an assessment of urgency and  
10  
11 efficient risk management of the patient, GP's attempts to elicit patient's own explanations  
12  
13 and obtain a wider past medical history demonstrated more familiar consultation  
14  
15 behaviours<sup>28</sup>.  
16  
17  
18  
19  
20

21  
22 The interactional differences observed in our sample reveal that nurse-led telephone triage,  
23  
24 using CDSS, is not a straightforward like-for-like substitution for GP-led triage. The design of  
25  
26 nurse questions could be seen as an adaptive strategy to the constraints of the software. As  
27  
28 a result, their attempts to rule out more serious conditions, manifested as a series of linked  
29  
30 checklist-style questions that appeared closer to a social survey than a medical interaction  
31  
32 orientated to patient's specific problems. This is reflected in the findings of the ESTEEM  
33  
34 process evaluation<sup>29</sup> which found that some patients did not understand why nurses asked  
35  
36 so many questions during triage calls, revealing that patients experience triage differently  
37  
38 when conducted by a nurse using CDSS or a GP without CDSS.  
39  
40  
41  
42  
43  
44

45  
46 Our findings also demonstrate that GPs acting independently, and nurses using CDSS are  
47  
48 likely to obtain different types of information from patients. The differences in information  
49  
50 collected may have an impact on how GPs and nurses decide on management and  
51  
52 disposition, and also on how patients are assessed in any subsequent consultation following  
53  
54 the triage call. A key task for assessing the value of these different approaches therefore lies  
55  
56  
57  
58  
59  
60

1  
2  
3 in research that examines how the content of triage calls is used in, or informs, subsequent  
4  
5 face-to-face or other primary care consultations.  
6  
7

8  
9  
10 GPs have historically been cast as expert decision-makers and so it is perhaps not surprising  
11  
12 that their eliciting of patient perspectives and detailed history have been identified as  
13  
14 common features of both face-to-face and telephone consultations<sup>15</sup>. Patient-centred  
15  
16 consultation styles have been shown to lead to increased patient satisfaction, treatment  
17  
18 adherence and treatment outcomes<sup>30-34</sup> and it would therefore seem to be a logical style to  
19  
20 reproduce within triage calls. However, the primary aim of telephone triage is to manage  
21  
22 and direct patients within the healthcare system. GPs, when eliciting patient explanations,  
23  
24 may therefore contribute to longer triage times than might be necessary to determine the  
25  
26 triage outcome. Nurses using CDSS, by contrast, would appear to strictly adhere to the end  
27  
28 point of patient management and perhaps more efficiently determine the route patients  
29  
30 should take in primary care. However, using CDSS involves extensive questioning which may  
31  
32 also unnecessarily contribute to longer triage times. How these different triage methods  
33  
34 affect triage outcome and overall consultation time; whether training nurses to adapt their  
35  
36 question design when using CDSS affects triage outcome; and how patients experience and  
37  
38 respond to these different approaches are key issues requiring investigation.  
39  
40  
41  
42  
43  
44  
45  
46  
47

#### 48 **Limitations and strengths of the study**

49  
50 This study was limited by the inclusion of only two GP practices. It is possible that nurses  
51  
52 and GPs conducting triage in other GP surgeries would have employed different patterns of  
53  
54 distribution of question designs, actions and activities to those reported here. Although GPs  
55  
56 did not use CDSS to triage patients, we also recognise that GPs may have actively consulted  
57  
58  
59  
60

1  
2  
3 electronic patient records whilst triaging which might have provided an interesting  
4  
5 comparison to the nurse data.  
6  
7  
8  
9

10 Given further training and experience of the CDSS, nurses might have delivered different  
11  
12 interactions from those we observed here. However, our findings clearly demonstrate how  
13  
14 the CDSS imposes a structure on the number, order and design of nurse's questioning  
15  
16 compared with GPs questioning. This is backed up by our observation of nurses' different  
17  
18 questioning pattern when not using CDSS. Investigating how nurses with extensive training  
19  
20 in the use of CDSS communicate with patients, and how this compares with nurses not using  
21  
22 CDSS would therefore provide important insights into the contribution of CDSS in supporting  
23  
24 nurses to deliver safe and effective patient management. The resonance between nurses'  
25  
26 questioning in our data and interactions observed in NHS Direct consultations<sup>18</sup>; and the  
27  
28 GP's questioning style in our data and previous research on telephone consultations<sup>15</sup> also  
29  
30 indicates how our findings may be transferred to other primary care settings. Training for  
31  
32 telephone triage could be designed to incorporate working with sample recordings and  
33  
34 transcripts of real calls to illustrate the full range of questions that can be asked in the  
35  
36 interrogative series; and how question design itself can be consequential for the nature of a  
37  
38 patient's response. Studies such as the one reported here therefore offer important insights  
39  
40 into the actual implementation of telephone triage using different professionals, and how  
41  
42 CDSS can organise telephone triage interactions and patient experiences. Such insights can  
43  
44 assist with the training of those professionals in conducting triage; with revealing how the  
45  
46 design of CDSS systems might be more effectively configured; and with the management of  
47  
48 patient expectations around new technologies for medical service delivery.  
49  
50  
51  
52  
53  
54  
55  
56  
57  
58  
59  
60

1  
2  
3 Although the parent trial to this study examined the issue of patient safety alongside  
4  
5 telephone triage<sup>23</sup>, we did not specifically examine safety in this qualitative study. Previous  
6  
7 relevant reviews<sup>2,35</sup>, and individual studies<sup>4,6,17,36</sup> are conflicting in respect of patient safety  
8  
9 outcomes and the related matters of hospital admissions or A&E attendance associated  
10  
11 with triage. Specific concerns have been raised in relation to the quality of information  
12  
13 gathering in telephone triage consultations<sup>8,17</sup>, and the differences in information-gathering  
14  
15 between nurses using CDSS, and GPs not using CDSS, in our findings place communication,  
16  
17 information-gathering and the role of CDSS at the heart of ongoing debates about patient  
18  
19 safety.  
20  
21  
22  
23  
24  
25

## 26 **CONCLUSION**

27  
28 Our data suggests nurse triage using CDSS is not a straightforward substitution for GP triage  
29  
30 without CDSS. Computer decision support software, employing algorithms designed to  
31  
32 minimise risk, plays a fundamental role in organising nurse's questioning during triage  
33  
34 leading to differences in the number, content and form of questions used by GPs and  
35  
36 nurses. These differences have consequences for the type of information collected from  
37  
38 patients during triage calls and for how patients experience those calls. These findings are  
39  
40 based on a small sample and it is not known how these triage styles are linked to triage  
41  
42 outcomes. However, given the well-established relationship between consultation style and  
43  
44 outcomes in primary care, our findings provide important evidence for the training of staff  
45  
46 and for the design of CDSS in supporting staff to conduct telephone triage.  
47  
48  
49  
50  
51  
52  
53  
54  
55  
56  
57  
58  
59  
60

## ACKNOWLEDGEMENTS

The authors would like to thank all patients, nurses and GPs for participating in this study.

## FUNDING

The study was funded by the South West GP Trust. Neither the funder nor the sponsor had a role in the design, data collection, analysis, interpretation, writing up, or decision to submit for publication, responsibility for which rested solely with the authors. The researchers were therefore independent from the funders in the conduct, analysis, write-up and dissemination of the study's findings.

The study was a sub-study to the ESTEEM trial. ESTEEM was funded by the NIHR Health Technology Assessment programme [project number 08/53/15]. HTA had no role in the design, data collection, analysis, interpretation, writing up, or decision to submit for publication, responsibility for which rested solely with the authors. The researchers were therefore independent from the funders in the conduct, analysis, write-up and dissemination of the study's findings.

The ESTEEM study will be published in full in Health Technology Assessment [volume and issue number to be confirmed]. See the HTA programme website for further project information. The ESTEEM report presents independent research commissioned by the National Institute for Health Research [NIHR]. The views and opinions expressed by the authors in this publication are those of the authors and do not necessarily reflect those of the NHS, the NIHR, MRC, CCF, NETSCC, the HTA programme or the Department of Health'

## CONTRIBUTORSHIP STATEMENT

Jamie Murdoch was joint principal investigator. With Rebecca Barnes, he led the development of the original protocol, funding application and co-ordinated the overall running of the project. He conducted the analyses, contributed to interpretation of

1  
2  
3 findings and drafted and edited the paper.

4  
5 Rebecca Barnes was joint principal investigator. With Jamie Murdoch, she led the  
6  
7 development of the original protocol, funding application and co-ordinated the overall  
8  
9 running of the project. She conducted the analyses, contributed to interpretation of  
10  
11 findings and drafted and edited the paper.

12  
13  
14 Jill Pooler was the Associate Research Fellow on the project. Jill implemented the  
15  
16 project protocol, including recruiting GP practice staff and patients and collection and  
17  
18 storage of data. She contributed to the analyses, interpretation of findings and edited  
19  
20 the paper.

21  
22  
23 John Campbell was Chief Investigator for the ESTEEM trial. John contributed to the  
24  
25 development of the original protocol, funding application and oversaw how the sub-  
26  
27 study was embedded within the running of the ESTEEM trial. He contributed to the  
28  
29 interpretation of the findings and edited the paper.

30  
31  
32 Val Lattimer was Co-Investigator for the ESTEEM trial. Val contributed to the  
33  
34 development of the original protocol and funding application. She contributed to how  
35  
36 the sub-study was embedded within the running of the ESTEEM trial, contributed to  
37  
38 the interpretation of the findings and edited the paper.

39  
40  
41 Emily Fletcher was Trial Manager for the ESTEEM trial. Emily contributed to the  
42  
43 development of the original protocol, funding application and obtaining R&D and  
44  
45 ethical approval. Emily managed the implementation of the sub-study within the  
46  
47 running of the ESTEEM trial. She contributed to the interpretation of the findings and  
48  
49 edited the paper.

### COMPETING INTEREST DECLARATION

All authors have completed the ICMJE uniform disclosure form at [www.icmje.org/coi\\_disclosure.pdf](http://www.icmje.org/coi_disclosure.pdf) and declare: all authors had financial support from SW GP Trust for the submitted work; no financial relationships with any organisations that might have an interest in the submitted work in the previous three years; no other relationships or activities that could appear to have influenced the submitted work."

### ETHICAL APPROVAL

The study was approved by the South West Research Ethics Committee, reference number: 09/H0202/53. All healthcare professionals and patients provided written consent before taking part.

### REFERENCES

1. Lattimer, V., George, S. (1996) Nurse telephone triage in out-of-hours primary care. *Primary Care Management*, 6:3–6.
2. Bunn F, Byrne G, Kendall S. The effects of telephone consultation and triage on healthcare use and patient satisfaction: a systematic review. *British Journal of General Practice* 2005;55(521):956-61.
3. Salisbury, C. et al. (2007) Impact of advanced access on access, workload, and continuity: controlled before-and-after and simulated-patient study. *British Journal of General Practice*, 57:608-14.
4. Richards, D.A., Meakins, J., Tawfik, J., et al. (2002) Nurse telephone triage for same day appointments in general practice: Multiple interrupted time series trial of effect on workload and costs. *British Medical Journal*, 325:1214-7.



- 1  
2  
3 5. Jiwa, M., Mathers, N.J., & Campbell, M.J. (2002) The effect of GP telephone triage on  
4  
5 numbers seeking same-day appointments. *British Journal of General Practice*,  
6  
7 52:390-1.  
8  
9
- 10 6. Lattimer V, George S, Thompson F, et al. (1998) Safety and effectiveness of nurse  
11  
12 telephone consultation in out of hours primary care: randomised controlled trial. The  
13  
14 South Wiltshire Out of Hours Project (SWOOP) Group. *British Medical Journal*,  
15  
16 317:1054-9.  
17  
18
- 19 7. Holmstrom I. (2007) Decision aid software programs in telenursing: not used as  
20  
21 intended? Experiences of Swedish telenurses. *Nursing Health Sciences*, 9:23-8.  
22  
23
- 24 8. McKinstry, B. et al, (2010). The quality, safety and content of telephone and face-to-  
25  
26 face consultations: a comparative study. *Quality & Safety in Health Care*, 19(4), 298-  
27  
28 303.  
29  
30
- 31 9. Poole, S.R., Schmitt, B.D., Carruth, T., et al. (1993) After-hours telephone coverage:  
32  
33 the application of an area-wide telephone triage and advice system for paediatric  
34  
35 practices. *Paediatrics*, 92:670-9.  
36  
37
- 38 10. McKinstry, B., Walker, J., Campbell, C., et al. (2002) Telephone consultations to  
39  
40 manage requests for same-day appointments: a randomised controlled trial in two  
41  
42 practices. *British Journal of General Practice*, 52:306-10.  
43  
44
- 45 11. Roing M., Rosenqvist, U., & Holmstrom, I.K. (2013) Threats to patient safety in  
46  
47 telenursing as revealed in Swedish telenurses' reflections on their dialogues.  
48  
49 *Scandinavian Journal of Caring Sciences*, 27: 969–976  
50  
51
- 52 12. Street Jr., R.L., Makoul, G., Arora, N.K., et al. (2009) How does communication heal?  
53  
54 Pathways linking clinician–patient communication to health outcomes, *Patient*  
55  
56 *Education & Counselling*, 74: 295-301  
57  
58  
59  
60

- 1  
2  
3 13. Collins, S. (2005) Explanations in consultations: the combined effectiveness of  
4  
5 doctors' and nurses' communication with patients. *Medical Education*, 39(8), 785-  
6  
7 796.  
8  
9  
10 14. Richards, D.A., Meakins, J., Tawfik, J., et al. (2004) Quality monitoring of nurse  
11  
12 telephone triage: pilot study. *Journal of Advance Nursing*, 47(5), 551-560.  
13  
14 15. Hewitt, H., Gafaranga, J. & McKinstry, B. (2010). Comparison of face-to-face and  
16  
17 telephone consultations in primary care: qualitative analysis. *British Journal of*  
18  
19 *General Practice*, 60(574), 341-347.  
20  
21 22. Plain Healthcare (2013). Odyssey TeleAssess. Retrieved July 2013, from  
23  
24 <http://www.plainhealthcare.co.uk/our-products/odyssey-range/teleassess>  
25  
26  
27 17. Derkx, H.P. et al. (2008) Quality of clinical aspects of call handling at Dutch out of  
28  
29 hours centres: cross sectional national study, *British Medical Journal*, 337, sep12,  
30  
31 p.a1264.  
32  
33 18. Pooler, J. (2010). *Technology and Talk in Calls to NHS Direct*. (PhD), Loughborough  
34  
35 University.  
36  
37 19. May, C. R., Mair, F., Finch, T., et al. (2009) Development of a theory of  
38  
39 implementation and integration: Normalization Process Theory. *Implementation*  
40  
41 *Science*, 4, 29.  
42  
43 20. Greatbatch, D., Hanlon, G., Goode, J., et al. (2005) Telephone triage, expert systems  
44  
45 and clinical expertise. *Sociology of Health & Illness*, 27(6), 802-830.  
46  
47  
48 21. Katz, H.P., Kaltsounis, D., Halloran, L. et al. (2007) Patient Safety and Telephone  
49  
50 Medicine: Some Lessons from Closed Claim Case Review. *Journal of General Internal*  
51  
52 *Medicine*, 23(5): 517-522.  
53  
54  
55  
56  
57  
58  
59  
60

- 1  
2  
3 22. Ernesäter, A., Winblad, U., Engström, M., et al. (2012) Malpractice claims regarding  
4  
5 calls to Swedish telephone advice nursing: what went wrong and why? *Journal of*  
6  
7 *Telemedicine & Telecare*, 18 (7): 379-383  
8  
9  
10 23. Campbell, J.L. et al. (2013) The effectiveness and cost effectiveness of telephone  
11  
12 triage of patients requesting same day consultations in general practice: a cluster  
13  
14 randomised controlled trial comparing nurse-led and GP-led management systems  
15  
16 (ESTEEM). *Trials*, 14:4 <http://www.trialsjournal.com/content/14/1/4>  
17  
18  
19 24. Jefferson, G. (2004). A Glossary of Transcript Symbols with an Introduction. In G.  
20  
21 Lerner (Ed.), *Conversation Analysis: Studies from the First Generation* (pp. 13-31).  
22  
23 Philadelphia: John Benjamins.  
24  
25  
26 25. Stivers, T. Enfield, N.J. (2010) A coding scheme for question–response sequences in  
27  
28 conversation, *Journal of Pragmatics*, doi:10.1016/j.pragma.2010.04.002  
29  
30  
31 26. Gill, V.T., Roberts, F. (2013) Conversation analysis in medicine. In J. Sidnell & T.  
32  
33 Stivers (Eds.) *The Handbook of Conversation Analysis*. Oxford: Wiley-Blackwell, 513-  
34  
35 541.  
36  
37  
38 27. Heritage, J. (2009) Questioning in Medicine. In A. F. Freed & S. Ehrlich (Eds.), *Why Do*  
39  
40 *You Ask?: The Function of Questions in Institutional Discourse*, New York: Oxford  
41  
42 University Press.  
43  
44  
45 28. Heritage, J. and Maynard, D.W. (2006) Introduction: Analyzing interaction between  
46  
47 doctors and patients in primary care encounters. In Heritage, J. and Maynard, D.  
48  
49 (eds.) *Communication in Medical Care: Interaction between primary care physicians*  
50  
51 *and patients*. Cambridge: Cambridge University Press.  
52  
53  
54  
55 29. Campbell, J.L. (2013) Personal Communication by email, 11 October  
56  
57  
58  
59  
60

- 1  
2  
3 30. Bertakis D., Roter D., & Putnam S.M. (1991) The relationship of physician medical  
4 interview style to patient satisfaction. *Journal of Family Practice*; 32:175-81.  
5  
6  
7  
8 31. Little P., Everitt H., Williamson I., et al. (2001) Observational study of effect of patient  
9 centredness and positive approach on outcomes of general practice consultations.  
10  
11 *British Medical Journal*; 323:908-11.  
12  
13  
14 32. Roter, D.L., Hall, J.A., Katz, N.R. (1987) Relations between physicians' behaviours and  
15 analogue patients' satisfaction, recall and impressions. *Medical Care*; 25:437-51.  
16  
17  
18 33. Roter, D.L., Hall, J.A., Kern, D.E., et al. (1995) Improving physicians' interviewing skills  
19 and reducing patients' emotional distress: a randomized clinical trial. *Archives of*  
20  
21 *Internal Medicine*; 155:1877-84.  
22  
23  
24 34. Stewart, M. (1984) What is a successful doctor-patient interview? A study of  
25 interactions and outcomes. *Social Science & Medicine*; 19:167-75.  
26  
27  
28 35. Huibers, L., Smits, M., Renaud, V., et al. (2011) Safety of telephone triage in out-of-  
29 hours care: A systematic review. *Scandinavian Journal of Primary Health Care*,  
30  
31 29(4):198-209.  
32  
33  
34 36. Thompson F, George S, Lattimer V, et al. (1999) Overnight calls in primary care:  
35 randomised controlled trial of management using nurse telephone consultation.  
36  
37  
38 *British Medical Journal*, 319(7222):1408.  
39  
40  
41  
42  
43  
44  
45  
46  
47  
48  
49  
50  
51  
52  
53  
54  
55  
56  
57  
58  
59  
60

## Question design in Nurse and GP-Led Telephone Triage for Same-Day Appointment

### Requests: A Comparative Investigation

Jamie Murdoch<sup>1</sup>, Rebecca Barnes<sup>2</sup>, Jillian Pooler<sup>3</sup>, Val Lattimer<sup>1</sup>, Emily Fletcher<sup>3</sup>, John L. Campbell<sup>3</sup>

#### Corresponding Author:

Dr Jamie Murdoch

School of Nursing Sciences, Edith Cavell Building, Faculty of Medicine and Health Sciences,

University of East Anglia, Norwich Research Park, Norwich NR4 7TJ

Telephone: 01603-597090

Fax: 01603-597019

Email: [Jamie.murdoch@uea.ac.uk](mailto:Jamie.murdoch@uea.ac.uk)

#### Addresses

<sup>1</sup>School of Nursing Sciences, Edith Cavell Building, Faculty of Medicine and Health

Sciences, University of East Anglia, Norwich Research Park, Norwich NR4 7TJ

<sup>2</sup>Centre for Academic Primary Care, School for Social and Community Medicine, Canynge

Hall, 39 Whatley Road, Bristol BS8 2PS

<sup>3</sup>Primary Care Research Group, University of Exeter Medical School, Room 106, Smeall

Building, St Luke's Campus, University of Exeter, Magdalen Road, Exeter EX1 2LU

#### Keywords:

Telephone; triage; communication; primary care; [computer-decision support software](#);

[conversation analysis](#); UK

**Word Count:** ~~4334~~3849 words

**Abstract**

**Objective:** To compare doctors' and nurses' communication with patients in primary care telephone triage consultations.

**Design:** Qualitative comparative study of content and form of questions in 51 telephone triage encounters between practitioners (GPs= 29; nurses=22) and patients requesting a same-day appointment in primary care. Audio-recordings of nurse-led calls were synchronised with video recordings of nurse's use of computer decision support software (CDSS) during triage.

**Setting:** Two GP practices in Devon and Warwickshire, UK.

**Participants:** Four GPs and 29 patients; and four nurses and 22 patients requesting a same-day face-to-face appointment with a GP.

**Main outcome measure:** Form and content of practitioner-initiated questions and patient responses during clinical assessment.

**Results:** A total of 484 question-response sequences were coded (160 GP; 324 N). Despite average call lengths being similar (GP=4mins, 37secs, (SD=1mins, 26secs); N=4mins, 39secs, (SD=2mins, 22secs)), GPs and nurses differed in the average number (GP=5.51, (SD=4.66); N=14.72, (SD=6.42)), the content and form of questions asked. A higher frequency of questioning in nurse-led triage was found to be due to nurses' use of CDSS to guide telephone triage. Eighty-nine per cent of nurse questions were oriented to asking patients about their reported complaint or to wider-information gathering, compared to 54% of GP questions. Forty-three percent of GP questions involved eliciting patient concerns or expectations, and obtaining details of past medical history, compared to 11% of nurse questions. Nurses using CDSS frequently delivered questions designed as declarative statements requesting confirmation and which typically preferred a 'no problem' response.

1  
2  
3 In contrast, GPs asked a higher proportion of interrogative questions designed to request  
4  
5 information.  
6

7  
8 **Conclusions:** Nurses and GPs emphasise different aspects of the clinical assessment process  
9  
10 during telephone triage. These different styles of triage have implications for the type of  
11  
12 information available following nurse or doctor-led triage, and for how patients experience  
13  
14 triage.  
15  
16  
17  
18  
19

#### ARTICLE SUMMARY

##### Strengths and limitations of this study

- Strengths of this study are that it is the first study to provide naturally occurring audio and video data directly comparing nurse-led and GP-led triage. It provides clear evidence that computer decision support software (CDSS) organises nurse questioning, creating very different triage interactions to GPs not using CDSS.
- This study was limited by the inclusion of only two GP practices. Given further training in the use of CDSS, the nurses in this study might also have conducted triage differently.
- The different styles of triage we observed have implications for the type of information collected from patients, and for how patients experience triage.

## INTRODUCTION

~~The use of the telephone to triage patients requesting same-day appointments represents one strategy to manage the increasing workload taking place in primary care<sup>1</sup>. Telephone triage is the process where calls, from people with a health care problem, are received, assessed and managed by giving advice or by referral to a more appropriate service<sup>1</sup>. It is increasingly being used internationally to help with the provision of out-of-hours care, manage demand for care, or provide an additional source of help and advice<sup>2</sup>. In the UK, the use of the telephone to triage patients requesting same-day appointments represents one strategy to manage the increasing workload taking place in primary care<sup>3</sup>. Nurses and general practitioners may provide telephone triage and consultation, with nurses typically trained to use computerised decision support software to provide this service, both in office hours and out-of-hours.~~ Whilst there is some evidence that telephone triage may reduce GP workload<sup>4,5</sup>, there is equivocal evidence that telephone triage is a safe<sup>6-9</sup> and satisfactory means of delivering care to patients<sup>5,10</sup>. The quality of patient-clinician interaction during triage and telephone consultation is key to aspects of safety, effectiveness, patient experience<sup>2,11</sup> and, potentially, to health outcomes<sup>12</sup>. How clinicians communicate with patients and respond to their presenting concerns within telephone triage consultations is therefore central to decisions about its delivery within primary care.

Research comparing how GPs and nurses communicate with patients within face-to-face consultations has identified patterned differences in the process of assessing patients and in the opportunities afforded to patients to explain their presenting problems<sup>13</sup>. Richards et al.<sup>14</sup> used GPs and nurses to retrospectively assess audio-taped nurse-led telephone triage, and found that GPs and nurses had only moderate levels of agreement on the level of



1  
2  
3 information sought by nurses and on the appropriateness of triage outcome. A recent study  
4  
5 using conversation analytic methods to compare doctor-patient consultations conducted  
6  
7 face-to-face and on the telephone<sup>15</sup> found little difference in consultation styles between  
8  
9 the two methods of delivering care, but found that patients differed in the number and  
10  
11 complexity of topics introduced on the telephone compared with face-to-face consultations.  
12  
13

14  
15  
16  
17 The role of computer decision support software (CDSS) and the professionals who use it is  
18  
19 central to assessing the safety and effectiveness of telephone triage. In primary care, CDSS is  
20  
21 promoted as supporting the clinical expertise of nurses to conduct triage<sup>16</sup>, representing a  
22  
23 substitute for the expertise provided by GPs who do not use CDSS to triage patients. Whilst  
24  
25 there is evidence that using CDSS to support clinical decisions is a safe and effective means  
26  
27 of triaging patients<sup>17</sup>, other research suggests that nurses orientate to potential dissonance  
28  
29 between CDSS question-prompts and the specific circumstances of the caller's concern<sup>18</sup>;  
30  
31 interact with both the patient and the CDSS in 'purposive interaction chains'<sup>19</sup>; or regularly  
32  
33 deviate from and modify CDSS prompted questions, potentially leading to a divergence  
34  
35 rather than standardisation in triage outcomes<sup>20</sup>.  
36  
37  
38  
39  
40  
41  
42

43 A recent retrospective case review of closed malpractice claims regarding telephone-related  
44  
45 consultations in the United States<sup>21</sup> found that 38% of litigation cases were because of  
46  
47 problems with communication. Reporting on cases involving clinicians from a range of  
48  
49 professional disciplines, Katz et al suggested that as workload increases, clinicians may rush  
50  
51 through triage and in some cases patients may be doing the triage rather than the clinician.  
52  
53

54  
55 In a similar analysis of calls to Swedish Healthcare Direct, Ernesater et al<sup>22</sup> reported that  
56  
57 failures in communication and asking the caller too few questions were commonly observed  
58  
59  
60

1  
2  
3 [in malpractice claims, a finding also reported in a Dutch study of simulated calls to out-of-](#)  
4  
5 [hours centres<sup>17</sup>.](#)  
6  
7

8  
9  
10 If nurse/GP triage is to be widely used within primary care in the UK there is [therefore](#) a  
11  
12 need for greater insight into patient-clinician telephone communication that is both safe  
13  
14 and acceptable to patients. To date there has been no research that has directly compared  
15  
16 telephone triage communication of nurses using CDSS with GPs conducting telephone triage  
17  
18 without the additional support of CDSS.  
19  
20

21  
22  
23  
24 We compared communication between GP-led and nurse-led computer-supported  
25  
26 telephone triage in primary care. We proposed to contribute an understanding of the ‘real-  
27  
28 time’ use of telephone triage in primary care by both nurses and GPs. In this article, we  
29  
30 focus on a key element of telephone triage – the interrogative series driving the process of  
31  
32 clinical assessment, - a crucial source of information to support decision-making about  
33  
34 triage outcomes.  
35  
36  
37  
38  
39

#### 40 **PARTICIPANTS AND METHODS**

41  
42  
43 The research was a sub-study, and formed part of the recruitment process for the ESTEEM  
44  
45 trial<sup>23</sup>, the first multi-centre randomised controlled trial to compare GP-led vs. nurse-led  
46  
47 telephone triage vs. usual care for UK patients requesting same-day appointments. [A](#)  
48  
49 [qualitative comparative study of nurse-led and GP-led triage consultations was used to](#)  
50  
51 [enable close analysis of interaction between clinicians and patients; and the role the CDSS](#)  
52  
53 [played in organising nurse-patient interactions.](#)  
54  
55  
56  
57  
58  
59  
60

1  
2  
3 Five intervention practices were approached (2 Nurse, 3 GP), from whom two were  
4  
5 successfully recruited (1 Nurse, 1 GP). Four Nurses and four GPs participated. Participating  
6  
7 practices were not systematically triaging patients prior to their inclusion in ESTEEM and  
8  
9 therefore nurses had to be trained in the use of CDSS prior to commencing the trial.  
10  
11 However, data for the sub-study were not collected until practices were in their final week  
12  
13 (average 8 weeks post training in CDSS) of participation in ESTEEM. Patients (or their proxy)  
14  
15 who phoned their surgery requesting a same-day, face-to-face appointment with a GP were  
16  
17 eligible for participation. Patients were excluded from the sub-study if they did not fulfill the  
18  
19 criteria for inclusion to the main ESTEEM trial<sup>23</sup>, including:  
20  
21

- 22 - Patients who were (i) too ill to participate; (ii) unable to speak English; (iii) temporary  
23  
24 residents.
- 25  
26 - Young people aged 12.0-15.9 years.
- 27  
28 - Children under 12 years unless a proxy phoned on their behalf.
- 29  
30  
31  
32  
33  
34  
35

36 Over a two-day period in each practice, 81 audio-recordings of telephone triage (47 Nurse,  
37  
38 34 GP) and 35 video-recordings of Nurses' use of Odyssey CDSS were made. Written consent  
39  
40 was given by patients to analyse 51 complete recorded calls (22 Nurse, 29 GP) including 10  
41  
42 video-recordings. Video-recordings were synchronized with audio-recordings to enable  
43  
44 analysis of how nurses used Odyssey during triage. Demographic data collected as part of  
45  
46 the ESTEEM trial were also extracted for consented patients. Call length was determined by  
47  
48 length of recording which began as soon as the patient picked up the telephone and ended  
49  
50 at the call close. Forty females (17 Nurse, 23 GP) and 11 males participated, with an average  
51  
52 age of 44 years (SD= 25) – see Table 1. In addition, triage outcome was collected for all  
53  
54 consenting patients – see Table 2.  
55  
56  
57  
58  
59  
60

## Analysis

All calls were transcribed in detail according to standard conversation analytic conventions<sup>24</sup> (see Box 2 for transcription key). Call lengths were measured from audio-recordings. This led to identifying potentially important differences between the two groups in call length and numbers of questions clinicians asked. In order to understand the nature of these differences ~~We~~ adapted an established conversation-analytic coding scheme for analysis of question-response sequences<sup>25</sup>. Conversation analysis is increasingly being used to support medical research aimed at understanding the distribution of interactional practices by offering operational definitions of phenomena that can subsequently be coded and counted<sup>26</sup>. Inclusion criteria for the coding scheme were:

- Questions had to ~~be either (or both) a formal question (i.e., it had to rely on lexico-morpho-syntactic or prosodic interrogative marking) or a functional question (i.e., it had to~~ effectively seek to elicit information, confirmation or agreement whether or not they made use of an interrogative sentence type);
- Questions seeking acknowledgment were **not** coded because they sought not neither confirmation nor affirmation;
- Repair questions (“Pardon”) as well as partial repeats (“He went where?”) were **not** coded;
- Questions that suggest, propose, or offer something to another as well as questions that request something from another were **not** coded (e.g. “Can I just confirm your date of birth before we go any further” or “Just bear with a moment we’ll see what we can have a look at for you”).

1  
2  
3 The scheme included 12 coding categories (see Box 1), including question design, the action  
4  
5 they performed and the responses elicited. We also coded for an additional dimension of  
6  
7 the broader activity questions were oriented towards. Working from the inclusion criteria  
8  
9 with audio-recordings and transcripts, all eligible questions were identified and agreed by  
10  
11 JM, RB and JP (n=484). Two raters (JM, RB) then each independently coded 10% of  
12  
13 questions to determine inter-rater reliability. Kappa scores were calculated for all coding  
14  
15 categories revealing moderate to high levels of agreement (0.67-1.00). JM coded the  
16  
17 remaining data and ambiguous cases were discussed in order to reach a consensus on the  
18  
19 final code. JM, RB and JP then closely examined prototypical cases identified in the coding of  
20  
21 question-response sequences and which demonstrated recurrent patterns of interaction  
22  
23 across the consultations.  
24  
25  
26  
27  
28  
29  
30  
31

32 **Box 1: Question-Response coding scheme (adapted from Stivers & Enfield 2010)**

- 33 • Semantic structure
- 34 • Through-produced multi-questions
- 35 • Polar questions –turn-final element; negative marking; declarative
- 36 • Type of Q-word in content Wh- questions
- 37 • Social action of question
- 38 • Response type
- 39 • Response timing
- 40 • Confirming or disconfirming answer to polar question
- 41 • Form of answer to polar question

42 Added for analysis of triage interactions:

- 43 • Question activity – reported complaint; wider-information gathering; eliciting  
44 patient explanations, views; past medical history

**Box 2: Transcription conventions<sup>24</sup>**

|               |                                                                                                                                                                                                  |
|---------------|--------------------------------------------------------------------------------------------------------------------------------------------------------------------------------------------------|
| (.)           | A micropause, hearable but too short to measure.                                                                                                                                                 |
| >he said<     | 'greater than' and 'lesser than' signs enclose speeded-up talk. Occasionally they are used the other way round for slower talk.                                                                  |
| Underlining   | indicates emphasis; the extent of underlining within individual words locates emphasis and also indicates how heavy it is.                                                                       |
| ↑ ↓           | Vertical arrows precede marked pitch movement, over and above normal rhythms of speech. They are used for notable changes in pitch beyond those represented by stops, commas and question marks. |
| she wa::nted  | Colons show degrees of elongation of the prior sound; the more colons, the more elongation.                                                                                                      |
| [ ]           | Square brackets mark the start and end of overlapping speech. They are aligned to mark the precise position of overlap as in the example below.                                                  |
| °↑I know it,° | 'degree' signs enclose hearably quieter speech.                                                                                                                                                  |

**RESULTS****Question Activity**

Average call length (minutes:seconds – mean, standard deviation, range) was similar across both arms, (Nurse-led = 4:39, 2:22, 1:45-10:46; GP-led = 4:37, 1:26, 1:29-8:14). However, nurses asked patients an average of 14.7 (SD = 6.4, range = 4-28) questions to assess the problem during telephone triage consultations, in contrast to only 5.5 (SD = 4.6, range = 0-17) asked by GPs. Nurses were predominantly oriented towards two types of question activity (Table 3) – the assessment of the patient's reported complaint (Nurse 32.1%; GP 21.9%) and wider information gathering around the reported complaint (Nurse 56.8%; GP 32.5%). In contrast, GP questions were more evenly distributed across four types of question activity, including eliciting patient's own explanations for their symptoms (Nurse 2.5%; GP 13.1%) - e.g. *There's no obvious explanation for that?* and seeking a more detailed

1  
2  
3 past medical history from the patient (Nurse 8.6%; GP 30.0%) – e.g. *What do you attend the*  
4  
5 *hospital for?*  
6  
7  
8  
9

10 **Table 1: Call Sample**

| 11 Call Sample Descriptors    | 12 Nurse-Led | 13 GP-Led   |
|-------------------------------|--------------|-------------|
| 14 Male                       | 15 5         | 16 6        |
| 17 Female                     | 18 17        | 19 23       |
| 20 Mean patient age (years)   | 21 45.2      | 22 44.7     |
| 23 Patient age range (years)  | 24 1.4-88.4  | 25 0.2-80.6 |
| 26 Calling on own behalf      | 27 17        | 28 22       |
| 29 Calling on behalf of other | 30 5         | 31 7        |
| 32 Unknown problem            | 33 18        | 34 18       |
| 35 Known problem              | 36 5         | 37 11       |
| 38 Single-issue problem       | 39 22        | 40 23       |
| 41 Multiple problems          | 42 0         | 43 6        |

44  
45  
46  
47  
48  
49  
50  
51  
52  
53  
54  
55  
56  
57  
58  
59  
60

**Table 2: Triage Outcome**

| Triage Outcome       | Nurse-Led | GP-Led |
|----------------------|-----------|--------|
| Same Day with nurse  | 10        | 2      |
| Same Day with GP     | 6         | 18     |
| Nurse or GP next day | 3         | 0      |
| Nurse or GP 3-7 days | 1         | 1      |
| Self-Care            | 2         | 3      |
| Nurse or GP >7 days  | 0         | 5      |

**Question Design and Action**

Over three-quarters of questions deployed by GPs and Nurses (Nurse 82.1% GP 76.3%) were polar questions. A key feature of polar questions is that they are designed for either a yes or no response<sup>27</sup>. Secondly, polar questions are commonly employed in medical history-taking where they are frequently designed to prefer a 'no problem' response. For example the inclusion of the negative polarity item 'at all' tilts, *Has she a temperature at all?* to prefer a *no* and therefore the absence of fever (an optimal state of affairs). In contrast *And you're breathing normally?* prefers a *yes* response and therefore the absence of breathing problems (again an optimal state of affairs). GPs used a higher proportion of polar questions with an interrogative design (Nurse 29.94% GP 46.25%) – e.g. *Have you vomited at all?* whilst over half of the nurses' polar questions were designed as declarative statements (Nurse 52.16% GP 30%) with a presupposed answer embodied within the question for confirmation or disconfirmation – e.g. *passing urine okay?* The proportion of polar,



1  
2  
3 declarative questions used by nurses is also reflected in the proportion of questions that  
4  
5 nurses asked that requested caller confirmation (Nurse 53.7% GP 31.87%). This stood out in  
6  
7 contrast to GPs predominantly asking questions that requested information rather than  
8  
9 confirmation (Nurse 45.99% GP 68.13%).  
10  
11

12  
13  
14 Nurses using CDSS, were therefore deploying a higher proportion of declarative questions  
15  
16 about the patient's reported complaint or wider-information gathering than GPs, designed  
17  
18 to optimise the report of the patient's situation by ruling out a variety of medical problems  
19  
20 (Nurse 45.37% GP 12.51%). In contrast, GPs, not using CDSS and therefore more able to self-  
21  
22 determine their questions, employed questions more evenly distributed across the four  
23  
24 different activities, typically designed as interrogatives aimed at requesting information  
25  
26 from the caller. In order to reveal the implications of these different distributions for how  
27  
28 GPs and Nurses, using CDSS, conducted telephone triage in our sample it is necessary to  
29  
30 examine how these differences in question number, activity, design and action are  
31  
32 consequential within the triage interactions themselves.  
33  
34  
35  
36  
37  
38  
39  
40  
41  
42  
43  
44  
45  
46  
47  
48  
49  
50  
51  
52  
53  
54  
55  
56  
57  
58  
59  
60

Table 3: Interrogative Series – Coding for Question Activity, Design and Action

| Activity                                                              | Nurse   | GP      |
|-----------------------------------------------------------------------|---------|---------|
| Reported Complaint                                                    | 32.1%   | 21.9%   |
| <i>E.g. Is he getting more breathless?</i>                            |         |         |
| Wider information gathering                                           | 56.8%   | 32.5%   |
| <i>E.g. and have you got a temperature at all do you feel hot?</i>    |         |         |
| Eliciting patient's concerns/ideas/expectations                       | 2.5%    | 13.1%   |
| <i>E.g. There's no obvious explanation for that?</i>                  |         |         |
| Past Medical history                                                  | 8.6%    | 30.0%   |
| <i>E.g. And is there any family history of arthritis of any sort?</i> |         |         |
| <b>Design</b>                                                         |         |         |
| Polar Questions - interrogative                                       | 29.9%   | 46.3%   |
| <i>E.g. Has she vomited at all</i>                                    |         |         |
| (Reported complaint & Wider-info gathering activities only)           | (25.9%) | (26.3%) |
| Polar Questions - declarative                                         | 52.2%   | 30.0%   |
| <i>E.g. And she's weeing okay</i>                                     |         |         |
| (Reported complaint & Wider-info gathering activities only)           | (45.4%) | (12.5%) |
| Content WH- questions                                                 | 13.3%   | 18.8%   |
| <i>E.g. And when did the tiredness first start</i>                    |         |         |
| Alternative questions                                                 | 4.6%    | 5.0%    |
| <i>E.g. Is it quite bad or just a little bit of dizziness</i>         |         |         |
| <b>Action</b>                                                         |         |         |
| Request for confirmation                                              | 53.7%   | 31.9%   |
| <i>E.g. And you said no discharge and no pain</i>                     |         |         |
| (Reported complaint & Wider-info gathering activities only)           | (46.6%) | (13.8%) |
| Request for information                                               | 46.0%   | 68.1%   |
| <i>E.g. Do you wear glasses or contact lenses?</i>                    |         |         |
| (Reported complaint & Wider-info gathering activities only)           | (42.3%) | (40.6%) |

### Gathering information during Nurse-led triage: a 'no problem' question series

When patients present a problem to clinicians, they may report several symptoms. Nurses, using Odyssey CDSS, need to select one of these symptoms and enter a key word to activate the CDSS for conducting triage with the patient. This activates a pop-up box with a series of symptom-related questions that prompt the nurse to ask of the patient. The nurse can select which questions to ask first but it is important the nurse asks those with a red or orange flag positioned adjacent to the question. Red-flagged questions have a default setting at the highest level of urgency and therefore if left unanswered Odyssey will recommend an emergency response. For each question asked, Odyssey prompts a set of responses in an additional pop-up box from which the nurse must select one. Odyssey therefore imposes an organisational structure on nurse questioning that is absent from GP-led triage. This structure is in terms of the number and order in which questions are asked, but also how questions are designed to elicit a response from patients that fits those offered by Odyssey.

The sequence and screenshot in Box 3 ([Figure 1](#)) illustrates an interrogative series common to the wider information gathering activity in nurse consultations, using polar questions which firstly constrain the type of response available to patients and secondly are designed to prefer 'no problem' type responses. In this sequence the caller is a mother of an infant who has a high temperature. The nurse has activated the CDSS using the keyword 'high temperature' which has led to the CDSS prompting the nurse to ask the caller about vomiting. This first question is a fully formed interrogative, with the negative polarity item 'at all' preferring a *no* response, indicating the nurse presupposing an absence (and therefore 'no problem') rather than presence of vomiting. The preferred response is

1  
2  
3 therefore one that should be brief (yes/no) but one which also informs the nurse of the  
4  
5 absence rather than presence of vomiting, which will enable a quick transition to the next  
6  
7 topic. The mother offers the preferred response with a partial repeat of the nurse's question  
8  
9 'No, she hasn't'. The nurse is then able move on to the next item in the list of prompted  
10  
11 questions, 'but she is taking fluids'. This time the nurse's question is designed as a  
12  
13 declarative with an optimized presupposition aimed at obtaining confirmation. The mother  
14  
15 again responds with a short reiteration of the nurse's statement, functioning to confirm that  
16  
17 the nurse's presupposition is correct 'Yes she's drinking some water'. The same question  
18  
19 design is then repeated 'and she's weeing okay'. Again the mother repeats the nurse's  
20  
21 words and confirms 'Yes she's weeing absolutely fine'. The nurse then switches to a  
22  
23 negative declarative design presupposing an absence of a rash and again we can see the  
24  
25 mother follows the same pattern. However, following the nurse's next question, we see a  
26  
27 slight variation in the mother's response. The nurse again presents a negative declarative  
28  
29 question 'she's not coughing', but this time the patient appears to disconfirm the nurse's  
30  
31 presupposition. However, this is not a direct disconfirmation (e.g. *Yes she is coughing*) but  
32  
33 instead the mother qualifies her response - *not a constant cough*, functioning to uphold the  
34  
35 nurse's presupposition as at least partially correct. Finally, the negative declarative 'no other  
36  
37 problems normally' is issued with the mother repeating the previous pattern, confirming the  
38  
39 optimized presupposition that there are 'no other problems.'

40  
41 This example was typical of how nurses could be seen to manage the demands of the CDSS  
42  
43 prompts by adapting questions that enabled swift progression through the consultation. The  
44  
45 use of *And* to preface questions, use of multiple declaratives, optimized for confirmation,  
46  
47 and a process of ellipsis whereby questions were shortened made this information  
48  
49  
50  
51  
52  
53  
54  
55  
56  
57  
58  
59  
60

gathering activity appear more as a checklist designed to rule out serious difficulties rather than orienting to the patient's specific presenting problem. Consequently, contracted sequences of interactions with short turns, illustrated in Box 3, were a common feature in the nurse-led data but virtually absent in the GP-led data.

**Box 3 and Figure 1: Nurse-Led triage – ‘no problem’ design questions**

N: **And has she vomited at all**

P: No (.) she hasn't no

N: And >I know you ha-< you said you hadn't given her her a >bottle this morni-< but she is taki::ng (.)

**flui::ds**

P: Yes she's drinking some (water)

N: **And she's weeing okay**

P: Yeah she's weeing absolutely fine

N: **No ra::sh?**

P: No no ra:sh

N: O<sup>↑</sup>ka::y, (1.8) **and no other symptoms she's not coughi::ng**

P: <sup>↑</sup>She had a little cough this morning (3.2) but not a constant cou:gh

N: **<sup>↑</sup>And <sup>↑</sup>normally we:ll no other problems normally::**

P: No she's normally fine running arou:nd like a,

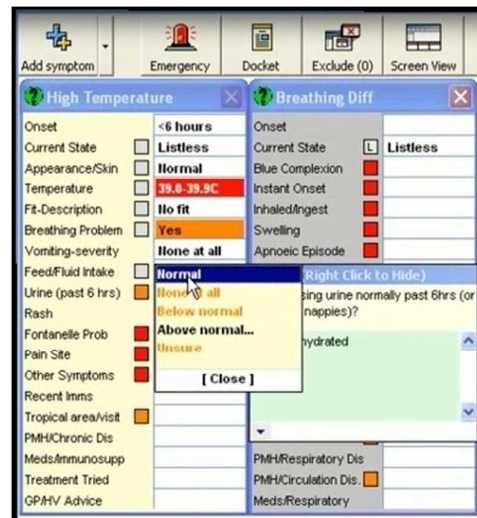

At 1 minute, 45 seconds<sup>i</sup>

In a few cases nurses could be seen to incorrectly presume a ‘no problem’ response from patients, resulting in some interactional difficulty whereby patients had to disconfirm the presupposition embodied in the question. In Box 4, an example is provided of a nurse asking about the radiation of pain, delivered as an optimised negative declarative statement for the patient to confirm. However there is a pause and then a non-straightforward response from the patient ‘We:ll...’ which serves to neither confirm or disconfirm the nurse’s presupposition. Even after referring to a previous statement and restating that there is some pain in the buttocks, the patient softens the weight of her disconfirmation with a

<sup>i</sup> The times here refer to the time that the extract begins in relation to the start of recording

further 'I don't know.' The effect is that the 'no problem' design in this case leads to a lack of clarity as to the location of the patient's presenting symptoms which is likely to be reflected in how the nurse records the patient's response in Odyssey.

**Box 4: Nurse-led triage - No problem design causing interactional difficulty**

N: **And you don't feel that it's moving down into the buttocks**  
(0.6)  
P: We::ll [I'd say it] (0.6) well I don't kno:::w it =  
N: [(?) ]  
P: =(.) it's as I sa:y it ha- halfway do::wn the buttock an- (.) not so far in I would think  
I don't ↑know  
N: Okay that's fi::ne

**At 1 minute, 53 seconds**

**GP-led triage: Questions designed to elicit patient's explanations**

In contrast to the exhaustive CDSS-led questioning about the nature of the reported complaint and wider information gathering around it apparent within the nurse-triage data, GPs were frequently observed eliciting patient's explanations for their symptoms. In the extract outlined in Box 5 it is evident that early on in the triage consultation, and immediately following the patient's reported complaint, the GP attempts to rule out any obvious explanations from the patient. Following an initial marked confirmation, the patient takes this opportunity to list the candidate explanations she has considered and the GP then moves straight to triage resolution. Importantly, despite the GP using polar declarative questions that request confirmation, they are orientated to the ongoing talk and caller's responses rather than presented as a series of checklist-style questions.

Interactions where patient's explanations were oriented to and followed up by the GP, were very rare in the nurse triage data and indicate GPs and nurses orientating to different

aspects of the assessment process during triage. Box 5 provides an example of the potential of orienting to patient's explanations for determining triage outcome more efficiently, without an exhaustive interrogative series delivered through the use of the CDSS. However, we observed many instances of GPs and patients engaging in lengthy discussions about the possible causes of symptoms as well as GPs obtaining a detailed wider history from the patient both of which were less common in the nurse data. By contrast, nurses using CDSS did not engage in lengthy discussions about possible diagnoses even when one was offered by the patient, instead confined to the information gathering demands of the CDSS.

**Box 5: GP-led triage - Eliciting patient explanations**

P: =on it woke up this morning and my who::le (.) my whole eye and the whole left hand side of my face is complete swollen, my ↑eyes almost closed,

D: °Okay° (.) **and there's no obvious explanation for that y-**

P: Not at all

D: °No okay°

P: No I haven't I haven't suffered it, (.) y- y::ou know >I don't suffer with< hay feve:r (.) haven't been anywhe::re (.) unusual or y- y- you kno::w didn't [walk the dogs in any (field)]

D: [(?) ] **(o:r) or**

**got anything in the eye or anything like that**

P: No: (>got to admit<) I went to be:d at half past ten (.) perfectly fi::ne (.) and m- I do sleep with my window slightly open

D: °Yep°

P: Um a::nd (04.) went straight to sleep within an hour I just sat bolt upright (0.4) with >this like< ↑burning sensa↑tion,

D: Okay (.) I think we're gonna need to take a look at you .hh can you [come] in this morning?

**At 0 minutes, 14 Seconds**

**Nurse-led triage without CDSS**

On a few occasions the Odyssey software was not activated during the recorded nurse-led calls. In these cases, question-response sequences were identified that did not follow the same pattern as those where CDSS was in use. Box 6 provides an example of a sequence where the nurse, not using CDSS, begins the wider information gathering activity with a

1  
2  
3 typical opening question about duration followed by a declarative question designed to  
4  
5 confirm previous patient information. However, instead of then asking a series of questions  
6  
7 aimed at gathering information on related symptoms, the nurse proposes a candidate  
8  
9 diagnosis. In a similar way to the GP data, this potential diagnosis is then negotiated with  
10  
11 the patient within the ongoing interaction.  
12  
13

14  
15  
16  
17 **Box 6: Nurse offering diagnosis when not using CDSS**

18  
19 N: an ongoing, (.) she's had a (.) recent viral illness  
20 P: Yeah  
21 N: And she's pulling at her (0.6) ea::r is ↑it?  
22 P: Yea:h, (.) both of them  
23 N: Is she [teething]?

24  
25 **At 1 minute, 3 seconds**  
26  
27

28  
29  
30  
31 **DISCUSSION**

32  
33 Despite nurses asking three times as many questions as GPs, the similarity in the duration of  
34  
35 triage calls is explained by the content and form of questions used and their different  
36  
37 interactional consequences. Most notably, nurses' frequent use of 'no-problem' polar  
38  
39 declaratives requesting confirmation, deployed predominantly to gather information around  
40  
41 the reported complaint, created contracted question-response sequences. These features  
42  
43 were almost completely absent in the GP data where more polar interrogatives were  
44  
45 employed to request information from patients, taking a more unknowing stance and  
46  
47 allowing more room for elaboration or sequence expansion<sup>27</sup>. GP questions also launched a  
48  
49 wider range of activities including eliciting patients' own views and obtaining a relevant past  
50  
51 medical history. This differential distribution of question design, action and activities in the  
52  
53 GP data led to typically longer patient responses and subsequently to other kinds of  
54  
55  
56  
57  
58  
59  
60



1  
2  
3 practitioner contribution such as GP's own evaluations, patient education or advice. The  
4  
5 nurses, using CDSS, and GPs, self-determining their questions, could therefore be  
6  
7 considered to promote different aspects of the clinical assessment process during telephone  
8  
9 triage. Whilst nurses' focus on current symptoms emphasised an assessment of urgency and  
10  
11 efficient risk management of the patient, GP's attempts to elicit patient's own explanations  
12  
13 and obtain a wider past medical history demonstrated more familiar consultation  
14  
15 behaviours<sup>28</sup>.  
16  
17  
18  
19

20  
21  
22 The interactional differences observed in our sample reveal that nurse-led telephone triage,  
23  
24 using CDSS, is not a straightforward like-for-like substitution for GP-led triage. The design of  
25  
26 nurse questions could be seen as an adaptive strategy to the constraints of the software. As  
27  
28 a result, their attempts to rule out more serious conditions, manifested as a series of linked  
29  
30 checklist-style questions that appeared closer to a social survey than a medical interaction  
31  
32 orientated to patient's specific problems. This is reflected in the findings of the ESTEEM  
33  
34 process evaluation<sup>29</sup> which found that some patients did not understand why nurses asked  
35  
36 so many questions during triage calls, revealing that patients experience triage differently  
37  
38 when conducted by a nurse using CDSS or a GP without CDSS.  
39  
40  
41  
42  
43  
44

45  
46 Our findings also demonstrate that GPs acting independently, and nurses using CDSS are  
47  
48 likely to obtain different types of information from patients. The differences in information  
49  
50 collected may have an impact on how GPs and nurses decide on management and  
51  
52 disposition, and also on how patients are assessed in any subsequent consultation following  
53  
54 the triage call. A key task for assessing the value of these different approaches therefore lies  
55  
56  
57  
58  
59  
60

1  
2  
3 in research that examines how the content of triage calls is used in, or informs, subsequent  
4  
5 face-to-face or other primary care consultations.  
6  
7  
8

9  
10 GPs have historically been cast as expert decision-makers and so it is perhaps not surprising  
11  
12 that their eliciting of patient perspectives and detailed history have been identified as  
13  
14 common features of both face-to-face and telephone consultations<sup>15</sup>. Patient-centred  
15  
16 consultation styles have been shown to lead to increased patient satisfaction, treatment  
17  
18 adherence and treatment outcomes<sup>320-34</sup> and it would therefore seem to be a logical style to  
19  
20 reproduce within triage calls. However, the primary aim of telephone triage is to manage  
21  
22 and direct patients within the healthcare system. GPs, when eliciting patient explanations,  
23  
24 may therefore contribute to longer triage times than might be necessary to determine the  
25  
26 triage outcome. Nurses using CDSS, by contrast, would appear to strictly adhere to the end  
27  
28 point of patient management and perhaps more efficiently determine the route patients  
29  
30 should take in primary care. However, using CDSS involves extensive questioning which may  
31  
32 also unnecessarily contribute to longer triage times. ~~The benefit of GPs delivering a more~~  
33  
34 ~~patient-centred consultation during triage, or nurses focusing solely on patient~~  
35  
36 ~~management, for patients and in terms of resources therefore remains unclear.~~ How these  
37  
38 different triage methods affect triage outcome and overall consultation time; whether  
39  
40 training nurses to adapt their question design when using CDSS affects triage outcome; and  
41  
42 how patients experience and respond to these different approaches are key issues requiring  
43  
44 investigation.  
45  
46  
47  
48  
49  
50  
51  
52  
53  
54

#### 55 **Limitations and strengths of the study**

56  
57  
58  
59  
60

1  
2  
3 This study was limited by the inclusion of only two GP practices. It is possible that nurses  
4  
5 and GPs conducting triage in other GP surgeries would have employed different patterns of  
6  
7 distribution of question designs, actions and activities to those reported here. Although GPs  
8  
9 did not use CDSS to triage patients, we also recognise that GPs may have actively consulted  
10  
11 electronic patient records whilst triaging which might have provided an interesting  
12  
13 comparison to the nurse data.

14  
15  
16  
17  
18  
19 ~~It might also be the case that g~~iven further training and experience of the CDSS, nurses  
20  
21 might would have delivered different interactions from those we observed here. However,  
22  
23 our findings clearly demonstrate how the CDSS imposes a structure on the number, order  
24  
25 and design of nurse's questioning compared with GPs questioning. This is backed up by our  
26  
27 observation of nurses' different questioning pattern when not using CDSS. Investigating how  
28  
29 nurses with extensive training in the use of CDSS communicate with patients, and how this  
30  
31 compares with nurses not using CDSS would therefore provide important insights into the  
32  
33 contribution of CDSS in supporting nurses to deliver safe and effective patient management.

34  
35  
36  
37  
38 The resonance between nurses' questioning in our data and interactions observed in NHS  
39  
40 Direct consultations<sup>18</sup>; and the GP's questioning style in our data and previous research on  
41  
42 telephone consultations<sup>15</sup> also indicates how our findings may be transferred to other  
43  
44 primary care settings. Training for telephone triage could be designed to incorporate  
45  
46 working with sample recordings and transcripts of real calls to illustrate the full range of  
47  
48 questions that can be asked in the interrogative series; and how question design itself can  
49  
50 be consequential for the nature of a patient's response. Studies such as the one reported  
51  
52 here therefore offer important insights into the actual implementation of telephone triage  
53  
54 using different professionals, and how CDSS can organise telephone triage interactions and  
55  
56  
57  
58  
59  
60

1  
2  
3 patient experiences. ~~Such insights can assist both with the training of those professionals in~~  
4 ~~conducting triage, help improve the design of CDSS systems, and manage patient~~  
5 ~~expectations.~~ Such insights can assist with the training of those professionals in conducting  
6 triage; with revealing how the design of CDSS systems might be more effectively configured;  
7 and with the management of patient expectations around new technologies for medical  
8 service delivery.

9  
10  
11  
12  
13  
14  
15  
16  
17  
18  
19 Although the parent trial to this study examined the issue of patient safety alongside  
20 telephone triage<sup>23</sup>, we did not specifically examine safety in this qualitative study. Previous  
21 relevant reviews<sup>2,35</sup>, and individual studies<sup>4,6,17,36</sup> are conflicting in respect of patient safety  
22 outcomes and the related matters of hospital admissions or A&E attendance associated  
23 with triage. Specific concerns have been raised in relation to the quality of information  
24 gathering in telephone triage consultations<sup>8,17</sup>, and the differences in information-gathering  
25 between nurses using CDSS, and GPs not using CDSS, in our findings place communication,  
26 information-gathering and the role of CDSS at the heart of ongoing debates about patient  
27 safety.

## CONCLUSION

28  
29  
30  
31  
32  
33  
34  
35  
36  
37  
38  
39  
40  
41  
42  
43  
44  
45 Our data suggests nurse triage using CDSS is not a straightforward substitution for GP triage  
46 without CDSS. Computer decision support software, employing algorithms designed to  
47 minimise risk, plays a fundamental role in organising nurse's questioning during triage  
48 leading to differences in the number, content and form of questions used by GPs and  
49 nurses. These differences have consequences for the type of information collected from  
50 patients during triage calls and for how patients experience those calls. These findings are

1  
2  
3 based on a small sample and it is not known how these triage styles are linked to triage  
4  
5 outcomes. However, given the well-established relationship between consultation style and  
6  
7 outcomes in primary care, our findings provide important evidence for the training of staff  
8  
9 and for the design of CDSS in supporting staff to conduct telephone triage.  
10  
11

## 12 13 14 15 **ACKNOWLEDGEMENTS**

16  
17 The authors would like to thank all patients, nurses and GPs for participating in this study.  
18  
19

## 20 21 22 **COMPETING INTEREST DECLARATION**

23  
24 All authors have completed the ICMJE uniform disclosure form at  
25  
26 [www.icmje.org/coi\\_disclosure.pdf](http://www.icmje.org/coi_disclosure.pdf) and declare: all authors had financial support from SW  
27  
28 GP Trust for the submitted work; no financial relationships with any organisations that  
29  
30 might have an interest in the submitted work in the previous three years; no other  
31  
32 relationships or activities that could appear to have influenced the submitted work."  
33  
34  
35  
36  
37

## 38 39 **FUNDING**

40  
41 The study was funded by the South West GP Trust. Neither the funder nor the sponsor had a  
42  
43 role in the design, data collection, analysis, interpretation, writing up, or decision to submit  
44  
45 for publication, responsibility for which rested solely with the authors. The researchers were  
46  
47 therefore independent from the funders in the conduct, analysis, write-up and  
48  
49 dissemination of the study's findings.  
50  
51

52  
53 The study was a sub-study to the ESTEEM trial. ESTEEM was funded by the NIHR Health  
54  
55 Technology Assessment programme [project number 08/53/15]. HTA had no role in the  
56  
57 design, data collection, analysis, interpretation, writing up, or decision to submit for  
58  
59  
60

1  
2  
3 publication, responsibility for which rested solely with the authors. The researchers were  
4  
5 therefore independent from the funders in the conduct, analysis, write-up and  
6  
7 dissemination of the study's findings.  
8

9  
10 The ESTEEM study will be published in full in Health Technology Assessment [volume and  
11  
12 issue number to be confirmed]. See the HTA programme website for further project  
13  
14 information. The ESTEEM report presents independent research commissioned by the  
15  
16 National Institute for Health Research [NIHR]. The views and opinions expressed by the  
17  
18 authors in this publication are those of the authors and do not necessarily reflect those of  
19  
20 the NHS, the NIHR, MRC, CCF, NETSCC, the HTA programme or the Department of Health'  
21  
22  
23  
24  
25  
26

## 27 ETHICAL APPROVAL

28  
29 The study was approved by the South West Research Ethics Committee, reference number:  
30  
31 09/H0202/53. All healthcare professionals and patients provided written consent before  
32  
33 taking part.  
34  
35  
36  
37

## 38 REFERENCES

- 39  
40  
41 1. Lattimer, V., George, S. (1996) Nurse telephone triage in out-of-hours primary care.  
42  
43 Primary Care Management, 6:3-6.  
44  
45  
46 2. Bunn F, Byrne G, Kendall S. The effects of telephone consultation and triage on  
47  
48 healthcare use and patient satisfaction: a systematic review. British Journal of  
49  
50 General Practice 2005;55(521):956-61.  
51  
52  
53 1-3. \_\_\_\_\_ Salisbury, C. et al. (2007) Impact of advanced access on access, workload, and  
54  
55 continuity: controlled before-and-after and simulated-patient study. British Journal  
56  
57 of General Practice, 57:608-14.  
58  
59  
60

- 1  
2  
3  
4  
5  
6  
7  
8  
9  
10  
11  
12  
13  
14  
15  
16  
17  
18  
19  
20  
21  
22  
23  
24  
25  
26  
27  
28  
29  
30  
31  
32  
33  
34  
35  
36  
37  
38  
39  
40  
41  
42  
43  
44  
45  
46  
47  
48  
49  
50  
51  
52  
53  
54  
55  
56  
57  
58  
59  
60
- ~~2-4.~~ Richards, D.A., Meakins, J., Tawfik, J., Godfrey, L., Dutton, E., Richardson, G. *et al.* (2002) Nurse telephone triage for same day appointments in general practice: Multiple interrupted time series trial of effect on workload and costs. *British Medical Journal*, 325:1214-7.
- ~~3-5.~~ Jiwa, M., Mathers, N.J., & Campbell, M.J. (2002) The effect of GP telephone triage on numbers seeking same-day appointments. *British Journal of General Practice*, 52:390-1.
6. Lattimer V, George S, Thompson F, Thomas E, Mullee M, Turnbull J, et al. (1998) Safety and effectiveness of nurse telephone consultation in out of hours primary care: randomised controlled trial. The South Wiltshire Out of Hours Project (SWOOP) Group. British Medical Journal, 317:1054-9.
- ~~4.~~ Crouch, R., Woodfield, H., Dale, J., & Patel, A. (1997) Telephone assessment and advice: a training programme. *Nursing Standard*, 11:41-4.
- ~~5-7.~~ Holmstrom I. (2007) Decision aid software programs in telenursing: not used as intended? Experiences of Swedish telenurses. *Nursing Health Sciences*, 9:23-8.
- ~~6-8.~~ McKinstry, B. et al, (2010). The quality, safety and content of telephone and face-to-face consultations: a comparative study. *Quality & Safety in Health Care*, 19(4), 298-303.
- ~~7-9.~~ Poole, S.R., Schmitt, B.D., Carruth, T., Peterson-Smith, A. & Slusarski, M. (1993) After-hours telephone coverage: the application of an area-wide telephone triage and advice system for paediatric practices. *Paediatrics*, 92:670-9.
- ~~8-10.~~ McKinstry, B., Walker, J., Campbell, C., Heaney, D. & Wyke, S. (2002) Telephone consultations to manage requests for same-day appointments: a

1  
2  
3 randomised controlled trial in two practices. *British Journal of General Practice*,  
4  
5 52:306-10.  
6

7  
8 11. Roing M., Rosenqvist, U., & Holmstrom, J.K. (2013) Threats to patient safety in  
9  
10 telenursing as revealed in Swedish telenurses' reflections on their dialogues.  
11  
12 *Scandinavian Journal of Caring Sciences*, 27: 969–976  
13

14  
15 12. Street Jr., R.L., Makoul, G., Arora, N.K., Epstein, R.M. (2009) How does  
16  
17 communication heal? Pathways linking clinician–patient communication to health  
18  
19 outcomes, *Patient Education & Counselling*, 74: 295-301  
20  
21

22 13. Collins, S. (2005) Explanations in consultations: the combined effectiveness of  
23  
24 doctors' and nurses' communication with patients. *Medical Education*, 39(8), 785-  
25  
26 796.  
27

28  
29 ~~9-14.~~ Richards, D.A., Meakins, J., Tawfik, J., Godfrey, L., Dutton, E., Heywood, P.  
30  
31 (2004) Quality monitoring of nurse telephone triage: pilot study. *Journal of Advance*  
32  
33 *Nursing*, 47(5), 551-560.  
34  
35

36 ~~10-15.~~ Hewitt, H., Gafaranga, J. & McKinstry, B. (2010). Comparison of face-to-face  
37  
38 and telephone consultations in primary care: qualitative analysis. *British Journal of*  
39  
40 *General Practice*, 60(574), 341-347.  
41  
42

43 ~~11-16.~~ Plain Healthcare (2013). Odyssey TeleAssess. Retrieved July 2013, from  
44  
45 <http://www.plainhealthcare.co.uk/our-products/odyssey-range/teleassess>  
46  
47

48 ~~12-17.~~ Derkx, H.P. et al. (2008) Quality of clinical aspects of call handling at Dutch  
49  
50 out of hours centres: cross sectional national study, *British Medical Journal*, 337,  
51  
52 sep12, p.a1264.  
53  
54

55 ~~13-18.~~ Pooler, J. (2010). *Technology and Talk in Calls to NHS Direct*. (PhD),  
56  
57 Loughborough University.  
58  
59  
60



- 1  
2  
3  
4  
5  
6  
7  
8  
9  
10  
11  
12  
13  
14  
15  
16  
17  
18  
19  
20  
21  
22  
23  
24  
25  
26  
27  
28  
29  
30  
31  
32  
33  
34  
35  
36  
37  
38  
39  
40  
41  
42  
43  
44  
45  
46  
47  
48  
49  
50  
51  
52  
53  
54  
55  
56  
57  
58  
59  
60
- ~~14-19.~~ May, C. R., Mair, F., Finch, T., MacFarlane, A., Dowrick, C., Treweek, S., et al. (2009) Development of a theory of implementation and integration: Normalization Process Theory. *Implementation Science*, 4, 29.
- ~~15-20.~~ Greatbatch, D., Hanlon, G., Goode, J., O'Cathain, A., Strangleman, T. & Luff, D. (2005) Telephone triage, expert systems and clinical expertise. *Sociology of Health & Illness*, 27(6), 802-830.
- ~~16-21.~~ Katz, H.P., Kaltsounis, D., Halloran, L. & Mondor, M. (2007) Patient Safety and Telephone Medicine: Some Lessons from Closed Claim Case Review. *Journal of General Internal Medicine*, 23(5): 517–522.
22. Ernesäter, A., Winblad, U., Engström, M., Holmström, I.K. (2012) Malpractice claims regarding calls to Swedish telephone advice nursing: what went wrong and why? *Journal of Telemedicine & Telecare*, 18 (7): 379-383
- ~~17-23.~~ Campbell, J.L. et al. (2013) The effectiveness and cost effectiveness of telephone triage of patients requesting same day consultations in general practice: a cluster randomised controlled trial comparing nurse-led and GP-led management systems (ESTEEM). *Trials*, 14:4 <http://www.trialsjournal.com/content/14/1/4>
- ~~18-24.~~ Jefferson, G. (2004). A Glossary of Transcript Symbols with an Introduction. In G. Lerner (Ed.), *Conversation Analysis: Studies from the First Generation* (pp. 13-31). Philadelphia: John Benjamins.
25. Stivers, T. Enfield, N.J. (2010) A coding scheme for question–response sequences in conversation, *Journal of Pragmatics*, doi:10.1016/j.pragma.2010.04.002
26. Gill, V.T., Roberts, F. (2013) Conversation analysis in medicine. In J. Sidnell & T. Stivers (Eds.) *The Handbook of Conversation Analysis*. Oxford: Wiley-Blackwell, 513-541.

- 1  
2  
3 | 19-27. \_\_\_\_\_ Heritage, J. (2009) Questioning in Medicine. In A. F. Freed & S. Ehrlich (Eds.),  
4 | *Why Do You Ask?: The Function of Questions in Institutional Discourse*, New York:  
5 | Oxford University Press.  
6  
7  
8  
9  
10 | 20-28. \_\_\_\_\_ Heritage, J. and Maynard, D.W. (2006) Introduction: Analyzing interaction  
11 | between doctors and patients in primary care encounters. In Heritage, J. and  
12 | Maynard, D. (eds.) *Communication in Medical Care: Interaction between primary*  
13 | *care physicians and patients*. Cambridge: Cambridge University Press.  
14  
15  
16  
17  
18  
19 | 21-29. \_\_\_\_\_ Campbell, J.L. (2013) Personal Communication by email, 11 October  
20  
21  
22 | 22-30. \_\_\_\_\_ Bertakis D., Roter D., & Putnam S.M. (1991) The relationship of physician  
23 | medical interview style to patient satisfaction. *Journal of Family Practice*; 32:175-81.  
24  
25  
26  
27 | 23-31. \_\_\_\_\_ Little P., Everitt H., Williamson I., Warner G., Moore M., Gould C., et al. (2001)  
28 | Observational study of effect of patient centredness and positive approach on  
29 | outcomes of general practice consultations. *British Medical Journal*; 323:908-11.  
30  
31  
32  
33 | 24-32. \_\_\_\_\_ Roter, D.L., Hall, J.A., Katz, N.R. (1987) Relations between physicians'  
34 | behaviours and analogue patients' satisfaction, recall and impressions. *Medical Care*;  
35 | 25:437-51.  
36  
37  
38  
39  
40 | 25-33. \_\_\_\_\_ Roter, D.L., Hall, J.A., Kern, D.E., Barker, R., Cole, K.A., Roca, R.P. (1995)  
41 | Improving physicians' interviewing skills and reducing patients' emotional distress: a  
42 | randomized clinical trial. *Archives of Internal Medicine*; 155:1877-84.  
43  
44  
45  
46  
47  
48 | 34. Stewart, M. (1984) What is a successful doctor-patient interview? A study of  
49 | interactions and outcomes. *Social Science & Medicine*; 19:167-75.  
50  
51  
52  
53 | 35. Huibers, L., Smits, M., Renaud, V., Giesen, P., Wensing, M. (2011) Safety of telephone  
54 | triage in out-of-hours care: A systematic review. *Scandinavian Journal of Primary*  
55 | *Health Care*, 29(4):198-209.  
56  
57  
58  
59  
60

- 1  
2  
3  
4  
5  
6  
7  
8  
9  
10  
11  
12  
13  
14  
15  
16  
17  
18  
19  
20  
21  
22  
23  
24  
25  
26  
27  
28  
29  
30  
31  
32  
33  
34  
35  
36  
37  
38  
39  
40  
41  
42  
43  
44  
45  
46  
47  
48  
49  
50  
51  
52  
53  
54  
55  
56  
57  
58  
59  
60
36. [Thompson F, George S, Lattimer V, Smith H, Moore M, Turnbull J, et al. \(1999\)](#)  
[Overnight calls in primary care: randomised controlled trial of management using](#)  
[nurse telephone consultation. \*British Medical Journal\*, 319\(7222\):1408.](#)

For peer review only

1  
2  
3  
4  
5  
6  
7  
8  
9  
10  
11  
12  
13  
14  
15  
16  
17  
18  
19  
20  
21  
22  
23  
24  
25  
26  
27  
28  
29  
30  
31  
32  
33  
34  
35  
36  
37  
38  
39  
40  
41  
42  
43  
44  
45  
46  
47  
48  
49  
50  
51  
52  
53  
54  
55  
56  
57  
58  
59  
60

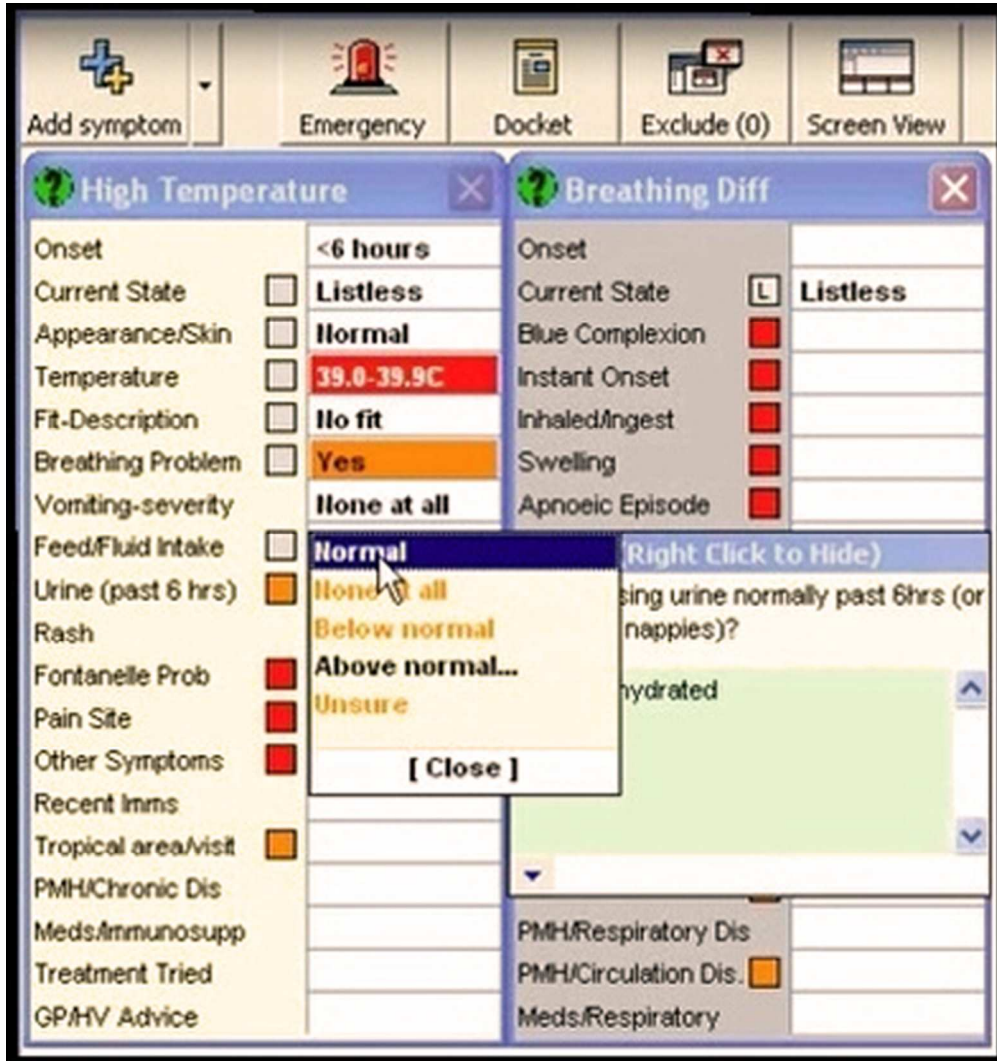

50x53mm (300 x 300 DPI)

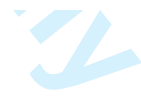

Supplement: bmjopen-2013-004515.draft_revisions.pdf [file bmjopen-2013-004515.draft_revisions.pdf]
